# Supplementary material for: Two Plant Viral Suppressors of Silencing Require the Ethylene-Inducible Host Transcription Factor RAV2 to Block RNA Silencing
Source: PubMed Central journal article supplement (PMC2800190; doi:10.1371/journal.ppat.1000729), 2010-01-15

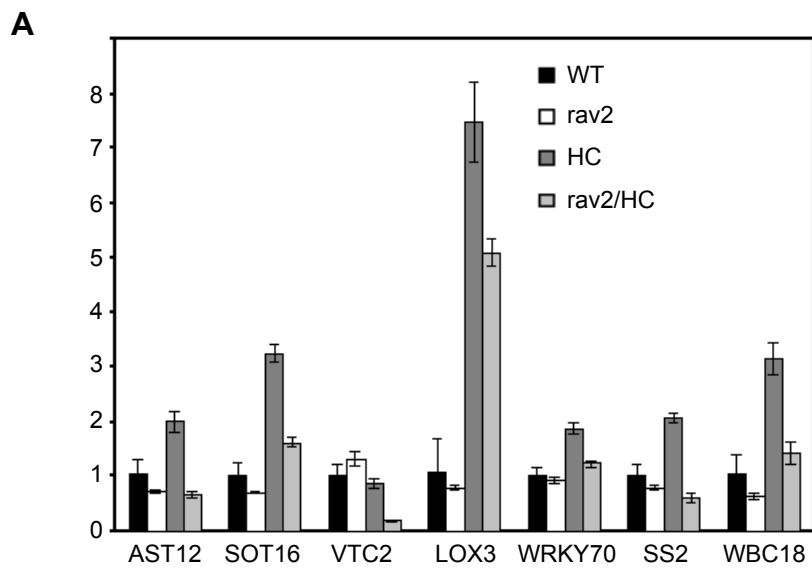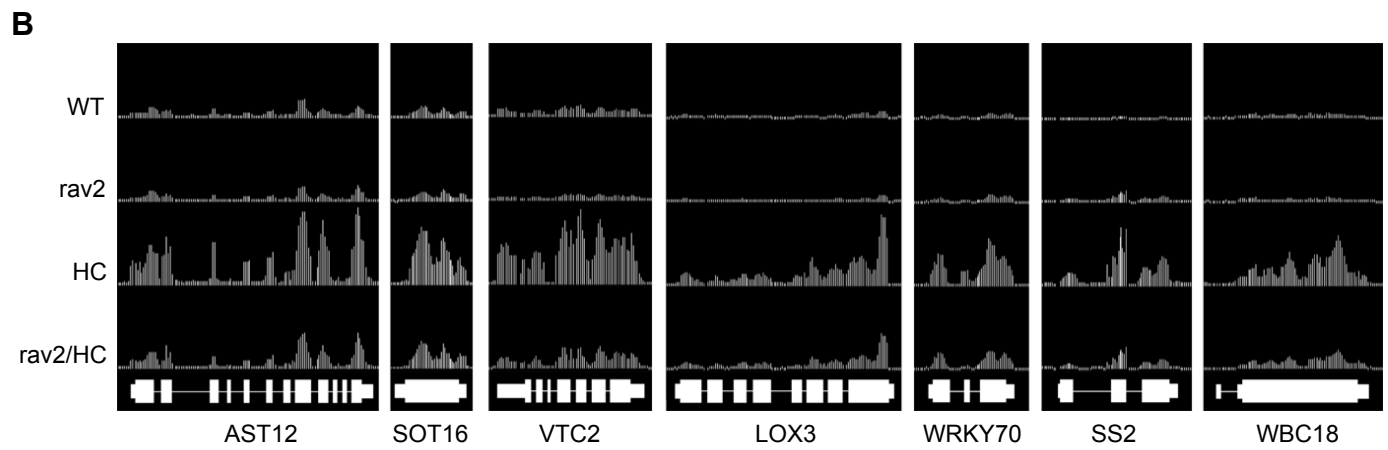

Supplement: ppat.1000729.s003.pdf [file ppat.1000729.s003.pdf]
