# Supplementary material for: Two Plant Viral Suppressors of Silencing Require the Ethylene-Inducible Host Transcription Factor RAV2 to Block RNA Silencing
Source: PLoS Pathog. 2010 Jan 15;6(1):e1000729. doi: 10.1371/journal.ppat.1000729 (PMC2800190; doi:10.1371/journal.ppat.1000729)
Supplement: Table S5 — Tiling array results: Arabidopsis genomic regions down-regulated in HC-Pro compared to rav2/HC-Pro plants (0.16 MB XLS) [file ppat.1000729.s008.xls]

## Sheet: Sheet1
Table S5. Tiling array results: Arabidopsis genomic regions down-regulated in HC-Pro compared to rav2/HC-Pro plants
chr	bpstart	bpend	post.prob	Gene	Annotation - for multiple identifier mappings only the annotation for the first identifier is shown, except in the case of the multi-line output option
chr1	101396	101779	998	At1g01240	similar to unknown protein [Arabidopsis thaliana] (TAIR:AT2G46550.1); similar to Os09g0363500 [Oryza sativa (japonica cultivar-group)] (GB:NP_001062992.1); similar to Os08g0400300 [Oryza sativa (japonica cultivar-group)] (GB:NP_001061754.1); similar to hypothetical protein MtrDRAFT_AC145165g14v1 [Medicago truncatula] (GB:ABE91800.1)
chr1	454945	455435	958	At1g02300	cathepsin B-like cysteine protease, putative
chr1	564364	564609	996	At1g02640	BXL2__BXL2 (BETA-XYLOSIDASE 2); hydrolase, hydrolyzing O-glycosyl compounds
chr1	566224	566755	999	At1g02640	BXL2__BXL2 (BETA-XYLOSIDASE 2); hydrolase, hydrolyzing O-glycosyl compounds
chr1	566860	567561	999	At1g02640	BXL2__BXL2 (BETA-XYLOSIDASE 2); hydrolase, hydrolyzing O-glycosyl compounds
chr1	739685	739972	994	At1g03090	MCCA__MCCA (3-methylcrotonyl-CoA carboxylase 1)
chr1	740861	741217	992	At1g03090	MCCA__MCCA (3-methylcrotonyl-CoA carboxylase 1)
chr1	742498	742683	874	At1g03090	MCCA__MCCA (3-methylcrotonyl-CoA carboxylase 1)
chr1	742836	742945	859	At1g03090	MCCA__MCCA (3-methylcrotonyl-CoA carboxylase 1)
chr1	743399	743770	994	At1g03090	MCCA__MCCA (3-methylcrotonyl-CoA carboxylase 1)
chr1	834618	835269	973	At1g03370	C2 domain-containing protein / GRAM domain-containing protein
chr1	882342	882380	978	At1g03530	ATNAF1_NAF1__similar to unknown protein [Arabidopsis thaliana] (TAIR:AT5G66540.1); similar to unnamed protein product [Kluyveromyces lactis] (GB:XP_456157.1); similar to Os05g0502800 [Oryza sativa (japonica cultivar-group)] (GB:NP_001055976.1); contains InterPro domain NAF1; (InterPro:IPR008696)
chr1	936207	936527	999	At1g03740	kinase
chr1	936633	936988	999	At1g03740	kinase
chr1	1143569	1143794	979	At1g04280	unknown protein
chr1	1465222	1465779	999	At1g05090	dentin sialophosphoprotein-related
chr1	1661836	1662175	999	At1g05575	similar to unknown protein [Arabidopsis thaliana] (TAIR:AT2G31945.1); similar to hypothetical protein [Oryza sativa (japonica cultivar-group)] (GB:BAD38225.1); similar to Os06g0207200 [Oryza sativa (japonica cultivar-group)] (GB:NP_001057099.1); similar to Os02g0774200 [Oryza sativa (japonica cultivar-group)] (GB:NP_001048273.1)
chr1	1744835	1745192	996	At1g05805	basic helix-loop-helix (bHLH) family protein
chr1	1747118	1747480	999	At1g05805	basic helix-loop-helix (bHLH) family protein
chr1	1749134	1749350	950	At1g05810	gene ARA/Ara-1/AtRABA5e/AtRab11D product ARA/Ara-1/AtRABA5e/AtRab11D (Arabidopsis Rab GTPase homolog A5e); GTP binding
chr1	1784273	1784482	973	At1g05890	zinc finger protein-related
chr1	2076684	2077277	999	At1g06760	histone H1, putative
chr1	2200647	2200868	851	At1g07170	Identical to Hypothetical protein At1g07170/At2g30000 [Arabidopsis Thaliana] (GB:O80873); similar to unknown protein [Arabidopsis thaliana] (TAIR:AT2G30000.1); similar to Os04g0663300 [Oryza sativa (japonica cultivar-group)] (GB:NP_001054163.1); similar to PREDICTED: similar to conserved hypothetical protein [Strongylocentrotus purpuratus] (GB:XP_799069.1); contains InterPro domain PHF5-like; (In…
chr1	2223724	2223941	920	At1g07240	UDP-glucoronosyl/UDP-glucosyl transferase family protein
chr1	2224045	2224346	976	At1g07240	UDP-glucoronosyl/UDP-glucosyl transferase family protein
chr1	2224804	2225405	999	At1g07240	UDP-glucoronosyl/UDP-glucosyl transferase family protein
chr1	2240797	2241048	972	At1g07280	binding
chr1	2855305	2855621	988	At1g08900	unknown protein
chr1	2885845	2886212	994	At1g08980	AMI1_ATTOC64-I_ATAMI1_AMI1__ATAMI1 (AMIDASE-LIKE PROTEIN 1); amidase
chr1	2886348	2886491	895	At1g08980	AMI1_ATTOC64-I_ATAMI1_AMI1__ATAMI1 (AMIDASE-LIKE PROTEIN 1); amidase
chr1	2971736	2972130	918	At1g09200	histone H3
chr1	3096407	3096880	961	At1g09570	PHYA_FHY2_FRE1_HY8__PHYA (PHYTOCHROME A); G-protein coupled photoreceptor/ signal transducer
chr1	3346454	3346758	842	At1g10200	WLIM1__transcription factor LIM, putative
chr1	3745129	3745596	999	At1g11180=p200	intergenic transcript
chr1	3777894	3778259	999	At1g11260	STP1__STP1 (SUGAR TRANSPORTER 1); carbohydrate transporter/ sugar porter
chr1	3778905	3779545	999	At1g11260	STP1__STP1 (SUGAR TRANSPORTER 1); carbohydrate transporter/ sugar porter
chr1	3779654	3780289	999	At1g11260	STP1__STP1 (SUGAR TRANSPORTER 1); carbohydrate transporter/ sugar porter
chr1	3875166	3875379	908	At1g11530	ATCXXS1__ATCXXS1 (C-TERMINAL CYSTEINE RESIDUE IS CHANGED TO A SERINE 1); thiol-disulfide exchange intermediate
chr1	4337565	4337746	925	At1g12730	cell division cycle protein-related
chr1	4410981	4411068	968	At1g12935=p800=int=At1g12940=p800	intergenic
chr1	4467282	4468072	999	At1g13110	CYP71B7__CYP71B7 (cytochrome P450, family 71, subfamily B, polypeptide 7); oxygen binding
chr1	4468148	4468806	999	At1g13110	CYP71B7__CYP71B7 (cytochrome P450, family 71, subfamily B, polypeptide 7); oxygen binding
chr1	4480813	4481249	986	At1g13145	pseudogene of unknown protein
chr1	4509059	4509812	999	At1g13210	haloacid dehalogenase-like hydrolase family protein
chr1	4525467	4525934	984	At1g13245	gene DVL4/RTFL17 product DVL4/RTFL17 (ROTUNDIFOLIA LIKE 17)
chr1	4547061	4547190	881	At1g13270	MAP1C_MAP1B__MAP1C (METHIONINE AMINOPEPTIDASE 1B); metalloexopeptidase
chr1	4761120	4761548	968	At1g13930	similar to nodulin-related [Arabidopsis thaliana] (TAIR:AT2G03440.1); similar to drought-induced protein SDi-6 - common sunflower (fragment) (GB:S71562)
chr1	4991648	4992555	999	At1g14580	zinc finger (C2H2 type) family protein
chr1	5043583	5043898	890	At1g14685	BPC2__BPC2 (BASIC PENTACYSTEINE 2)
chr1	5043965	5044131	919	At1g14685	BPC2__BPC2 (BASIC PENTACYSTEINE 2)
chr1	5205712	5206027	999	At1g15125	S-adenosyl-L-methionine:carboxyl methyltransferase family protein
chr1	5412025	5412463	999	At1g15740	leucine-rich repeat family protein
chr1	5414363	5414507	871	At1g15750	TPL_WSIP1__TPL/WSIP1 (WUS-INTERACTING PROTEIN 1)
chr1	6305941	6306225	994	At1g18330	EPR1__EPR1 (EARLY-PHYTOCHROME-RESPONSIVE1); DNA binding / transcription factor
chr1	6414089	6414345	996	At1g18620	similar to unknown protein [Arabidopsis thaliana] (TAIR:AT1G74160.1); similar to expressed protein [Oryza sativa (japonica cultivar-group)] (GB:ABF96645.1); similar to Os07g0109400 [Oryza sativa (japonica cultivar-group)] (GB:NP_001058723.1); similar to Os07g0603300 [Oryza sativa (japonica cultivar-group)] (GB:NP_001060212.1)
chr1	6538408	6538521	999	At1g18930	pseudogene, hypothetical protein
chr1	6543363	6543477	999	At1g18930	pseudogene, hypothetical protein
chr1	6704185	6704332	999	At1g19392	copia-like retrotransposon family
chr1	6709152	6709266	999	At1g19392	copia-like retrotransposon family
chr1	6764529	6764897	999	At1g19530	unknown protein
chr1	6806957	6807605	999	At1g19680	protein binding / zinc ion binding
chr1	6832836	6833270	994	At1g19770	ATPUP14__ATPUP14 (Arabidopsis thaliana purine permease 14); purine transporter
chr1	6833564	6833800	817	At1g19770	ATPUP14__ATPUP14 (Arabidopsis thaliana purine permease 14); purine transporter
chr1	6938075	6938677	999	At1g20010	TUB5__TUB5 (tubulin beta-5 chain)
chr1	6940072	6940429	999	At1g20010	TUB5__TUB5 (tubulin beta-5 chain)
chr1	6946854	6947025	861	At1g20030	pathogenesis-related thaumatin family protein
chr1	7144468	7145571	999	At1g20620	CAT3_SEN2__CAT3 (CATALASE 3); catalase
chr1	7148237	7148950	999	At1g20630	CAT1__CAT1 (CATALASE 1); catalase
chr1	7149423	7149674	884	At1g20630	CAT1__CAT1 (CATALASE 1); catalase
chr1	7178423	7178651	998	At1g20693	HMGB2_HMG BETA 1_NFD02_NFD2__HMGB2 (HIGH MOBILITY GROUP B 2)
chr1	7181170	7181423	865	At1g20693	HMGB2_HMG BETA 1_NFD02_NFD2__HMGB2 (HIGH MOBILITY GROUP B 2)
chr1	7244931	7245497	999	At1g20840	TMT1__TMT1 (TONOPLAST MONOSACCHARIDE TRANSPORTER1); carbohydrate transporter/ nucleoside transporter/ sugar porter
chr1	7387007	7387200	999	At1g21100	O-methyltransferase, putative
chr1	7387420	7387523	945	At1g21100	O-methyltransferase, putative
chr1	7387599	7387725	997	At1g21100	O-methyltransferase, putative
chr1	7389971	7390286	999	At1g21110	O-methyltransferase, putative
chr1	7390507	7390821	999	At1g21110	O-methyltransferase, putative
chr1	7395242	7395378	982	At1g21120	O-methyltransferase, putative
chr1	7395451	7395608	943	At1g21120	O-methyltransferase, putative
chr1	7395737	7396077	999	At1g21120	O-methyltransferase, putative
chr1	7399000	7399418	999	At1g21120	O-methyltransferase, putative
chr1	7399571	7399864	999	At1g21130	O-methyltransferase, putative
chr1	7400007	7400390	999	At1g21130	O-methyltransferase, putative
chr1	7496067	7496444	999	At1g21400	2-oxoisovalerate dehydrogenase, putative / 3-methyl-2-oxobutanoate dehydrogenase, putative / branched-chain alpha-keto acid dehydrogenase E1 alpha subunit, putative
chr1	7578315	7578642	936	At1g21610	wound-responsive family protein
chr1	7611157	7611474	806	At1g21670	similar to unknown protein [Arabidopsis thaliana] (TAIR:AT1G21680.1); similar to WD40 domain protein beta Propeller [Solibacter usitatus Ellin6076] (GB:YP_828764.1); similar to Os03g0840200 [Oryza sativa (japonica cultivar-group)] (GB:NP_001051846.1); similar to Os07g0638100 [Oryza sativa (japonica cultivar-group)] (GB:NP_001060406.1); contains InterPro domain WD40-like Beta Propeller; (InterPro:…
chr1	7611994	7612497	999	At1g21670	similar to unknown protein [Arabidopsis thaliana] (TAIR:AT1G21680.1); similar to WD40 domain protein beta Propeller [Solibacter usitatus Ellin6076] (GB:YP_828764.1); similar to Os03g0840200 [Oryza sativa (japonica cultivar-group)] (GB:NP_001051846.1); similar to Os07g0638100 [Oryza sativa (japonica cultivar-group)] (GB:NP_001060406.1); contains InterPro domain WD40-like Beta Propeller; (InterPro:…
chr1	7613442	7615250	999	At1g21680	similar to unknown protein [Arabidopsis thaliana] (TAIR:AT1G21670.1); similar to WD40 domain protein beta Propeller [Solibacter usitatus Ellin6076] (GB:YP_828764.1); similar to Os03g0840200 [Oryza sativa (japonica cultivar-group)] (GB:NP_001051846.1); similar to Os07g0638100 [Oryza sativa (japonica cultivar-group)] (GB:NP_001060406.1); contains InterPro domain TolB, C-terminal; (InterPro:IPR01104…
chr1	7791710	7791988	940	At1g22070	TGA3__TGA3 (TGA1a-related gene 3); DNA binding / calmodulin binding / transcription factor
chr1	7859276	7859624	985	At1g22250	unknown protein
chr1	8027618	8028094	999	At1g22690	gibberellin-responsive protein, putative
chr1	8200723	8201085	974	At1g23130	Bet v I allergen family protein
chr1	8434774	8435021	914	At1g23870	ATTPS9_TPS9__ATTPS9 (Arabidopsis thaliana trehalose-phosphatase/synthase 9); transferase, transferring glycosyl groups / trehalose-phosphatase
chr1	8435168	8435502	985	At1g23870	ATTPS9_TPS9__ATTPS9 (Arabidopsis thaliana trehalose-phosphatase/synthase 9); transferase, transferring glycosyl groups / trehalose-phosphatase
chr1	8508435	8508793	979	At1g24050	similar to unknown protein [Arabidopsis thaliana] (TAIR:AT1G70220.1); similar to hypothetical protein Afu6g08070 [Asper (GB:XP_750698.1); similar to Os02g0741900 [Oryza sativa (japonica cultivar-group)] (GB:NP_001048085.1); contains domain FAMILY NOT NAMED (PTHR13542); contains domain SUBFAMILY NOT NAMED (PTHR13542:SF2)
chr1	8663344	8663844	999	At1g24440	protein binding / zinc ion binding
chr1	8775889	8776084	920	At1g24822	similar to unknown protein [Arabidopsis thaliana] (TAIR:AT1G25097.1); similar to unknown protein [Arabidopsis thaliana] (TAIR:AT1G25170.1)
chr1	8777062	8777540	872	At1g24822	similar to unknown protein [Arabidopsis thaliana] (TAIR:AT1G25097.1); similar to unknown protein [Arabidopsis thaliana] (TAIR:AT1G25170.1)
chr1	8798417	8798612	920	At1g24967=p800	intergenic transcript
chr1	8799590	8800068	872	At1g24996	unknown protein
chr1	8813968	8814446	872	At1g25097	similar to unknown protein [Arabidopsis thaliana] (TAIR:AT1G24822.1); similar to unknown protein [Arabidopsis thaliana] (TAIR:AT1G25170.1)
chr1	8828346	8828824	872	At1g25170	similar to unknown protein [Arabidopsis thaliana] (TAIR:AT1G25097.1); similar to unknown protein [Arabidopsis thaliana] (TAIR:AT1G24822.1)
chr1	8840423	8840650	916	At1g25230	purple acid phosphatase family protein
chr1	8860709	8861142	999	At1g25275	unknown protein
chr1	9144411	9144686	911	At1g26440	ATUPS5__ATUPS5 (ARABIDOPSIS THALIANA UREIDE PERMEASE 5)
chr1	9185211	9185722	999	At1g26580	similar to myb family transcription factor / ELM2 domain-containing protein [Arabidopsis thaliana] (TAIR:AT2G03470.1); similar to Os03g0425800 [Oryza sativa (japonica cultivar-group)] (GB:NP_001050406.1); similar to expressed protein [Oryza sativa (japonica cultivar-group)] (GB:AAS07212.1)
chr1	9186458	9187425	999	At1g26580	similar to myb family transcription factor / ELM2 domain-containing protein [Arabidopsis thaliana] (TAIR:AT2G03470.1); similar to Os03g0425800 [Oryza sativa (japonica cultivar-group)] (GB:NP_001050406.1); similar to expressed protein [Oryza sativa (japonica cultivar-group)] (GB:AAS07212.1)
chr1	9285490	9286118	999	At1g26800	zinc finger (C3HC4-type RING finger) family protein
chr1	9352391	9352565	946	At1g26945	transcription regulator
chr1	9426319	9426707	999	At1g27130	ATGSTU13_GST12__ATGSTU13 (GLUTATHIONE S-TRANSFERASE 12); glutathione transferase
chr1	9533587	9534007	992	At1g27450	APT1_APRT_APT__APT1 (ADENINE PHOSPHORIBOSYLTRANSFERASE 1)
chr1	9612144	9612323	982	At1g27630	CYCT1;3__cyclin family protein
chr1	9613763	9614223	984	At1g27630	CYCT1;3__cyclin family protein
chr1	9875073	9875484	865	At1g28250	similar to hypothetical protein [Oryza sativa (japonica cultivar-group)] (GB:BAC84779.1)
chr1	9875803	9876353	927	At1g28260	binding
chr1	9933887	9934609	999	At1g28330	DRM1__DRM1 (DORMANCY-ASSOCIATED PROTEIN 1)
chr1	10225616	10225895	868	At1g29260	PEX7__PEX7 (peroxin 7)
chr1	10288229	10288446	838	At1g29395	COR414-TM1__COR414-TM1 (cold regulated 414 thylakoid membrane 1)
chr1	10944951	10945380	999	At1g30820	CTP synthase, putative / UTP--ammonia ligase, putative
chr1	11454499	11454825	999	At1g31885=utr3=int=At1g31900=p800	orphan RNA
chr1	11569838	11570274	960	At1g32160	similar to unknown protein [Arabidopsis thaliana] (TAIR:AT3G17800.2); similar to unknown protein [Oryza sativa (japonica cultivar-group)] (GB:AAO38836.1); similar to Os03g0717900 [Oryza sativa (japonica cultivar-group)] (GB:NP_001051084.1); similar to Os04g0595100 [Oryza sativa (japonica cultivar-group)] (GB:NP_001053731.1); contains InterPro domain Protein of unknown function DUF760; (InterPro:I…
chr1	11738799	11739223	999	At1g32460	unknown protein
chr1	11828269	11828444	985	At1g32700	zinc-binding family protein
chr1	11969313	11969665	989	At1g33050	similar to unknown protein [Arabidopsis thaliana] (TAIR:AT4G10470.1); similar to Subtilisin-like serine protease [Pediococcus pentosaceus ATCC 25745] (GB:YP_803612.1)
chr1	12177815	12178089	978	At1g33590	disease resistance protein-related / LRR protein-related
chr1	12178207	12179134	999	At1g33590	disease resistance protein-related / LRR protein-related
chr1	12180864	12181556	998	At1g33600	leucine-rich repeat family protein
chr1	12354497	12354892	983	At1g33980	ATUPF3_UPF3__ATUPF3/UPF3; nucleotide binding
chr1	12505003	12505584	999	At1g34300	lectin protein kinase family protein
chr1	12597506	12597948	965	At1g34460	CYCB1;4_CYC3__cyclin, putative
chr1	13026616	13027016	835	At1g35420	dienelactone hydrolase family protein
chr1	13079188	13079480	896	At1g35515	HOS10_MYB8__HOS10 (HIGH RESPONSE TO OSMOTIC STRESS 10); DNA binding
chr1	13146011	13146160	933	At1g35612	pseudogene of Ulp1 protease family protein
chr1	13146308	13146778	999	At1g35612	pseudogene of Ulp1 protease family protein
chr1	13331031	13331125	829	At1g35840	copia-like retrotransposon family
chr1	14487158	14487171	882	At1g38430=p800=int=At1g38440=p800	intergenic
chr1	14510074	14510164	996	At1g38550=utr3=int=At1g38630=utr3	intergenic
chr1	14512028	14512048	961	At1g38550=utr3=int=At1g38630=utr3	intergenic
chr1	15084742	15084756	817	At1g40103=p800	intergenic transcript associated with smRNAs and repeats
chr1	15085272	15085286	817	At1g40103=p800=int=At1g40105=p800	intergenic transcript associated with smRNAs and repeats
chr1	15085781	15085833	952	At1g40103=p800=int=At1g40105=p800	intergenic associated with repeats and smRNAs
chr1	15086038	15086172	885	At1g40103=p800=int=At1g40105=p800	intergenic transcript associated with smRNAs and repeats
chr1	15087551	15087594	921	At1g40103=p800=int=At1g40105=p800	intergenic associated with repeats and smRNAs
chr1	15087748	15087762	802	At1g40103=p800=int=At1g40105=p800	intergenic transcript associated with smRNAs and repeats
chr1	15439544	15439560	893	At1g40470=p800	intergenic transcript associated with smRNAs and repeats
chr1	15872982	15873083	994	At1g42410	CACTA-like transposase family (Ptta/En/Spm)
chr1	16488461	16488744	907	At1g43700	VIP1__VIP1 (VIRE2-INTERACTING PROTEIN 1); transcription factor
chr1	17304801	17305163	999	At1g47210	CYCA3;2__CYCA3;2; cyclin-dependent protein kinase
chr1	17346918	17347128	982	At1g47310	similar to conserved hypothetical protein [Medicago truncatula] (GB:ABE81232.1)
chr1	17805325	17805588	994	At1g48210	serine/threonine protein kinase, putative
chr1	17851360	17852181	999	At1g48300	similar to soluble diacylglycerol acyltransferase [Arachis hypogaea] (GB:AAX62735.1); contains InterPro domain Thioredoxin-like fold; (InterPro:IPR012336); contains InterPro domain Thioredoxin fold; (InterPro:IPR012335)
chr1	18142154	18142574	999	At1g49030=utr3=int=At1g49040=utr3	intergenic transcript
chr1	18405173	18405603	995	At1g49720	ABF1__ABF1 (ABSCISIC ACID RESPONSIVE ELEMENT-BINDING FACTOR 1); DNA binding / transcription factor/ transcriptional activator
chr1	18478531	18478574	824	At1g49900	zinc finger (C2H2 type) family protein
chr1	18508963	18509261	935	At1g49975	similar to expressed protein [Oryza sativa (japonica cultivar-group)] (GB:AAT77883.1); similar to Os03g0731100 [Oryza sativa (japonica cultivar-group)] (GB:NP_001051164.1)
chr1	18691000	18691380	995	At1g50440	zinc finger (C3HC4-type RING finger) family protein
chr1	19644967	19645293	987	At1g52720	similar to unknown protein [Arabidopsis thaliana] (TAIR:AT3G15630.1); similar to conserved hypothetical protein [Medicago truncatula] (GB:ABE92597.1)
chr1	19954909	19955311	999	At1g53440	leucine-rich repeat family protein / protein kinase family protein
chr1	20139610	20140308	952	At1g53910	RAP2.12__RAP2.12
chr1	20207554	20207732	915	At1g54115	cation exchanger, putative
chr1	20214462	20215411	996	At1g54130	RSH3__RSH3 (RELA/SPOT HOMOLOG 3); catalytic
chr1	20215739	20216291	994	At1g54130	RSH3__RSH3 (RELA/SPOT HOMOLOG 3); catalytic
chr1	20220706	20220955	912	At1g54150	zinc finger (C3HC4-type RING finger) family protein
chr1	20434555	20434740	933	At1g54740	similar to unknown protein [Arabidopsis thaliana] (TAIR:AT1G22110.1); similar to hypothetical protein [Oryza sativa (japonica cultivar-group)] (GB:BAD28434.1)
chr1	20434817	20435076	992	At1g54740	similar to unknown protein [Arabidopsis thaliana] (TAIR:AT1G22110.1); similar to hypothetical protein [Oryza sativa (japonica cultivar-group)] (GB:BAD28434.1)
chr1	20435218	20435397	981	At1g54740	similar to unknown protein [Arabidopsis thaliana] (TAIR:AT1G22110.1); similar to hypothetical protein [Oryza sativa (japonica cultivar-group)] (GB:BAD28434.1)
chr1	20519477	20519810	990	At1g55000	peptidoglycan-binding LysM domain-containing protein
chr1	21040362	21040884	999	At1g56210	copper chaperone (CCH)-related
chr1	21047054	21047893	999	At1g56220	dormancy/auxin associated family protein
chr1	21048003	21048331	935	At1g56220	dormancy/auxin associated family protein
chr1	21542167	21542531	849	At1g58180	carbonate dehydratase/ zinc ion binding
chr1	21557643	21558125	893	At1g58210	EMB1674__EMB1674 (EMBRYO DEFECTIVE 1674)
chr1	21568514	21568722	990	At1g58225	unknown protein
chr1	22039680	22040891	999	At1g59870	PDR8_PEN3__PDR8/PEN3 (PLEIOTROPIC DRUG RESISTANCE8); ATPase, coupled to transmembrane movement of substances
chr1	22041667	22041921	964	At1g59870	PDR8_PEN3__PDR8/PEN3 (PLEIOTROPIC DRUG RESISTANCE8); ATPase, coupled to transmembrane movement of substances
chr1	22041993	22042464	999	At1g59870	PDR8_PEN3__PDR8/PEN3 (PLEIOTROPIC DRUG RESISTANCE8); ATPase, coupled to transmembrane movement of substances
chr1	22042607	22043586	999	At1g59870	PDR8_PEN3__PDR8/PEN3 (PLEIOTROPIC DRUG RESISTANCE8); ATPase, coupled to transmembrane movement of substances
chr1	23671294	23671636	999	At1g63800	UBC5__UBC5 (ubiquitin-conjugating enzyme 37); ubiquitin-protein ligase
chr1	23891573	23891822	999	At1g64360	unknown protein
chr1	23892429	23893318	999	At1g64370	similar to hypothetical protein FG03565.1 [Gibberella zeae PH-1] (GB:XP_383741.1)
chr1	24114826	24114979	878	At1g64890	integral membrane transporter family protein
chr1	25502959	25503105	961	At1g68020	ATTPS6_TPS6__ATTPS6 (Arabidopsis thaliana trehalose phosphatase/synthase 6); trehalose-phosphatase
chr1	25503664	25503976	994	At1g68020	ATTPS6_TPS6__ATTPS6 (Arabidopsis thaliana trehalose phosphatase/synthase 6); trehalose-phosphatase
chr1	25563094	25563526	994	At1g68190	zinc finger (B-box type) family protein
chr1	25564131	25564543	985	At1g68190	zinc finger (B-box type) family protein
chr1	25564681	25564858	940	At1g68190	zinc finger (B-box type) family protein
chr1	25885883	25886266	999	At1g68845	anti-sense to unknown protein
chr1	25963424	25963950	931	At1g69040	ACR4__ACR4 (ACT REPEAT 4); amino acid binding
chr1	26327929	26328253	984	At1g69890	similar to unknown protein [Arabidopsis thaliana] (TAIR:AT1G27100.1); similar to Cytosolic fatty-acid binding; Actin-crosslinking proteins [Medicago truncatula] (GB:ABE82702.1); contains InterPro domain Protein of unknown function DUF569; (InterPro:IPR007679); contains InterPro domain Actin-crosslinking proteins; (InterPro:IPR008999)
chr1	26709309	26709626	866	At1g70820	phosphoglucomutase, putative / glucose phosphomutase, putative
chr1	26711621	26711787	835	At1g70820	phosphoglucomutase, putative / glucose phosphomutase, putative
chr1	27058713	27059213	999	At1g71880	SUC1__SUC1 (SUCROSE-PROTON SYMPORTER 1); carbohydrate transporter/ sucrose:hydrogen symporter/ sugar porter
chr1	27059570	27059810	982	At1g71880	SUC1__SUC1 (SUCROSE-PROTON SYMPORTER 1); carbohydrate transporter/ sucrose:hydrogen symporter/ sugar porter
chr1	27097260	27097623	936	At1g71970	similar to unknown protein [Arabidopsis thaliana] (TAIR:AT1G22680.1); similar to Os12g0174300 [Oryza sativa (japonica cultivar-group)] (GB:NP_001066287.1)
chr1	27103102	27103455	997	At1g71970	similar to unknown protein [Arabidopsis thaliana] (TAIR:AT1G22680.1); similar to Os12g0174300 [Oryza sativa (japonica cultivar-group)] (GB:NP_001066287.1)
chr1	27122333	27122475	990	At1g72070	DNAJ heat shock N-terminal domain-containing protein
chr1	27152214	27152551	987	At1g72150	PATL1__PATL1 (PATELLIN 1); transporter
chr1	27152733	27153382	999	At1g72150	PATL1__PATL1 (PATELLIN 1); transporter
chr1	27262797	27262983	981	At1g72416	heat shock protein binding
chr1	27593045	27593186	804	At1g73380	similar to conserved hypothetical protein [Medicago truncatula] (GB:ABE81139.1); contains InterPro domain Protein of unknown function DUF1308; (InterPro:IPR010733)
chr1	27594140	27594421	967	At1g73380	similar to conserved hypothetical protein [Medicago truncatula] (GB:ABE81139.1); contains InterPro domain Protein of unknown function DUF1308; (InterPro:IPR010733)
chr1	27996214	27996591	829	At1g74470	geranylgeranyl reductase
chr1	28063816	28064668	991	At1g74680	exostosin family protein
chr1	28149945	28150379	999	At1g74940	senescence-associated protein-related
chr1	28181744	28182580	999	At1g75040	PR5_PR-5__PR5 (PATHOGENESIS-RELATED GENE 5)
chr1	28276044	28276326	895	At1g75350	EMB2184__EMB2184 (EMBRYO DEFECTIVE 2184); structural constituent of ribosome
chr1	28287008	28287266	974	At1g75380	wound-responsive protein-related
chr1	28462713	28462992	998	At1g75800	pathogenesis-related thaumatin family protein
chr1	28463029	28463384	999	At1g75800	pathogenesis-related thaumatin family protein
chr1	28463898	28464355	999	At1g75800	pathogenesis-related thaumatin family protein
chr1	28746493	28747048	999	At1g76590	zinc-binding family protein
chr1	28897741	28898525	990	At1g76920	F-box family protein (FBX3)
chr1	29013951	29014264	999	At1g77210	sugar transporter, putative
chr1	29014419	29014851	999	At1g77210	sugar transporter, putative
chr1	29014959	29015362	999	At1g77210	sugar transporter, putative
chr1	29015744	29015928	908	At1g77210	sugar transporter, putative
chr1	29419613	29419942	991	At1g78170	similar to unknown protein [Arabidopsis thaliana] (TAIR:AT1G22250.1); similar to WW domain containing protein, expressed [Oryza sativa (japonica cultivar-group)] (GB:ABA96334.2); similar to Os03g0191200 [Oryza sativa (japonica cultivar-group)] (GB:NP_001049232.1)
chr1	29523309	29523488	960	At1g78460	SOUL heme-binding family protein
chr1	29523601	29523787	958	At1g78460	SOUL heme-binding family protein
chr1	29523933	29524228	999	At1g78460	SOUL heme-binding family protein
chr1	29995330	29995721	999	At1g79700	ovule development protein, putative
chr1	30045938	30046268	922	At1g79840	GL2__GL2 (GLABRA 2); DNA binding / transcription factor
chr1	30162113	30162297	956	At1g80180	similar to unknown protein [Arabidopsis thaliana] (TAIR:AT1G15400.3); similar to Os06g0601100 [Oryza sativa (japonica cultivar-group)] (GB:NP_001058003.1); similar to Os01g0174100 [Oryza sativa (japonica cultivar-group)] (GB:NP_001042161.1)
chr1	30201166	30201337	853	At1g80310	sulfate transporter
chr1	30247286	30247902	997	At1g80440	kelch repeat-containing F-box family protein
chr1	30320215	30320634	998	At1g80650	gene RTL1 product RTL1 (RNASE THREE-LIKE PROTEIN 1); double-stranded RNA binding
chr1	30409064	30409526	999	At1g80920	J8__J8; heat shock protein binding / unfolded protein binding
chr2	82926	83177	910	At2g01100	similar to CXIP4 (CAX INTERACTING PROTEIN 4), nucleic acid binding / zinc ion binding [Arabidopsis thaliana] (TAIR:AT2G28910.1); similar to hypothetical protein MtrDRAFT_AC144731g21v1 [Medicago truncatula] (GB:ABE92235.1); similar to Os01g0120700 [Oryza sativa (japonica cultivar-group)] (GB:NP_001041870.1)
chr2	914173	914291	999	At2g03080	copia-like retrotransposon family
chr2	1013967	1014242	822	At2g03330	similar to unknown protein [Arabidopsis thaliana] (TAIR:AT3G11810.1); similar to predicted F-box and bHLH containing protein [Overexpression vector pFC12860OE] (GB:ABK41847.1); similar to Os12g0257500 [Oryza sativa (japonica cultivar-group)] (GB:NP_001066512.1)
chr2	1395256	1395373	999	At2g04140	copia-like retrotransposon family
chr2	1399350	1399424	998	At2g04140	copia-like retrotransposon family
chr2	1617799	1617912	996	At2g04620=p800=int=At2g04625=utr3	intergenic
chr2	1645477	1645627	996	At2g04690	cellular repressor of E1A-stimulated genes (CREG) family
chr2	1645920	1646138	906	At2g04690	cellular repressor of E1A-stimulated genes (CREG) family
chr2	1877477	1877821	940	At2g05185	unknown protein
chr2	2350119	2350480	897	At2g06025	GCN5-related N-acetyltransferase (GNAT) family protein
chr2	3605799	3605844	999	At2g07880=utr3=int=At2g07981=p800	intergenic transcript associated with smRNAs and repeats
chr2	3606149	3606189	999	At2g07880=utr3=int=At2g07981=p800	intergenic transcript associated with smRNAs and repeats
chr2	3606505	3606545	999	At2g07880=utr3=int=At2g07981=p800	intergenic transcript associated with smRNAs and repeats
chr2	3606671	3606734	999	At2g07880=utr3=int=At2g07981=p800	intergenic transcript associated with smRNAs and repeats
chr2	3606862	3606878	989	At2g07880=utr3=int=At2g07981=p800	intergenic transcript associated with smRNAs and repeats
chr2	3607049	3607079	999	At2g07880=utr3=int=At2g07981=p800	intergenic transcript associated with smRNAs and repeats
chr2	3607217	3607257	999	At2g07880=utr3=int=At2g07981=p800	intergenic transcript associated with smRNAs and repeats
chr2	3607739	3607802	999	At2g07880=utr3=int=At2g07981=p800	intergenic transcript associated with smRNAs and repeats
chr2	3616374	3616404	841	At2g07981	unknown protein
chr2	3625248	3625321	815	At2g08986	unknown protein
chr2	3626026	3626037	941	At2g08986	unknown protein
chr2	3626181	3626211	999	At2g08986	unknown protein
chr2	3627076	3627113	884	At2g08986	unknown protein
chr2	3627778	3627851	864	At2g08986	unknown protein
chr2	3627783	3627812	805	At2g08986	unknown protein
chr2	3627977	3627991	814	At2g08986	unknown protein
chr2	3629580	3629599	879	At2g08986	unknown protein
chr2	3633289	3633326	911	At2g08986	unknown protein
chr2	3634339	3634376	826	At2g08986=utr3=int=At2g09187=utr3	intergenic transcript associated with smRNAs and repeats
chr2	3634424	3634554	844	At2g08986=utr3=int=At2g09187=utr3	intergenic transcript associated with smRNAs and repeats
chr2	3670831	3670875	848	At2g09790=utr3=int=At2g09800=p800	intergenic transcript associated with smRNAs and repeats
chr2	3671322	3671342	961	At2g09790=utr3=int=At2g09800=p800	intergenic transcript associated with smRNAs and repeats
chr2	3671599	3671608	835	At2g09790=utr3=int=At2g09800=p800	intergenic transcript associated with smRNAs and repeats
chr2	4490727	4491253	997	At2g11240	non-LTR retrotransposon family (LINE)
chr2	6518004	6518269	974	At2g15040	pseudogene, disease resistance protein-related, low similarity to disease resistance protein Cf-2.1 (Lycopersicon pimpinellifolium)
chr2	6518337	6518688	998	At2g15040	pseudogene, disease resistance protein-related, low similarity to disease resistance protein Cf-2.1 (Lycopersicon pimpinellifolium)
chr2	6518879	6519205	999	At2g15040	pseudogene, disease resistance protein-related, low similarity to disease resistance protein Cf-2.1 (Lycopersicon pimpinellifolium)
chr2	6519274	6519383	910	At2g15040	pseudogene, disease resistance protein-related, low similarity to disease resistance protein Cf-2.1 (Lycopersicon pimpinellifolium)
chr2	6543329	6543721	988	At2g15080	disease resistance family protein
chr2	6622001	6622360	997	At2g15230	ATLIP1__ATLIP1 (ARABIDOPSIS THALIANA LIPASE 1); galactolipase/ hydrolase/ phospholipase/ triacylglycerol lipase
chr2	6805137	6805416	997	At2g15580	zinc finger (C3HC4-type RING finger) family protein
chr2	6928066	6928404	999	At2g15890	MEE14__MEE14 (maternal effect embryo arrest 14)
chr2	6928699	6929026	999	At2g15890	MEE14__MEE14 (maternal effect embryo arrest 14)
chr2	6954624	6954899	999	At2g15960	unknown protein
chr2	6957487	6958242	999	At2g15970	COR413-PM1_FL3-5A3_WCOR413__COR413-PM1 (cold regulated 413 plasma membrane 1)
chr2	7082301	7082761	960	At2g16365	F-box family protein
chr2	7083095	7083616	998	At2g16365	F-box family protein
chr2	7095359	7095651	980	At2g16380	SEC14 cytosolic factor family protein / phosphoglyceride transfer family protein
chr2	7208016	7208596	997	At2g16600	ROC3__ROC3 (rotamase CyP 3)
chr2	7739451	7739925	978	At2g17787	unknown protein
chr2	7774069	7774726	999	At2g17880	DNAJ heat shock protein, putative
chr2	7834859	7835224	949	At2g17990	similar to kinectin-related [Arabidopsis thaliana] (TAIR:AT5G66250.3); similar to putative calcium-dependent protein kinase CPK1 adapter protein 2 [Mesembryanthemum crystallinum] (GB:AAR06858.1); contains domain no description (G3D.1.20.58.90)
chr2	7853351	7853529	992	At2g18050	HIS1-3__HIS1-3 (HISTONE H1-3); DNA binding
chr2	7853604	7853883	999	At2g18050	HIS1-3__HIS1-3 (HISTONE H1-3); DNA binding
chr2	7954619	7954846	937	At2g18280	AtTLP2__AtTLP2 (TUBBY LIKE PROTEIN 2); phosphoric diester hydrolase/ transcription factor
chr2	7954918	7955433	999	At2g18280	AtTLP2__AtTLP2 (TUBBY LIKE PROTEIN 2); phosphoric diester hydrolase/ transcription factor
chr2	8097983	8098091	839	At2g18660	EXLB3__expansin family protein (EXPR3)
chr2	8098245	8098495	999	At2g18660	EXLB3__expansin family protein (EXPR3)
chr2	8101541	8101860	872	At2g18680	similar to unknown protein [Arabidopsis thaliana] (TAIR:AT2G18690.1); similar to Os08g0107100 [Oryza sativa (japonica cultivar-group)] (GB:NP_001060795.1); similar to conserved hypothetical protein [Medicago truncatula] (GB:ABE90086.1)
chr2	8117569	8118045	988	At2g18700	ATTPS11_ATTPSB_TPS11__ATTPS11 (Arabidopsis thaliana trehalose phosphatase/synthase 11); transferase, transferring glycosyl groups
chr2	8129549	8130029	950	At2g18740=p800	intergenic transcript
chr2	8135145	8135677	985	At2g18750	calmodulin binding
chr2	8383290	8383552	962	At2g19350	similar to unknown protein [Arabidopsis thaliana] (TAIR:AT4G29850.1); similar to unknown [Gymnadenia conopsea] (GB:ABD66514.1); contains InterPro domain Protein of unknown function DUF872, eukaryotic; (InterPro:IPR008590)
chr2	8557693	8558862	999	At2g19810	zinc finger (CCCH-type) family protein
chr2	9178598	9178648	999	At2g21420	zinc finger protein-related
chr2	9226482	9226493	972	At2g21530	forkhead-associated domain-containing protein / FHA domain-containing protein
chr2	9272375	9272766	999	At2g21660	GRP7_GR-RBP7_ATGRP7_CCR2__ATGRP7 (COLD, CIRCADIAN RHYTHM, AND RNA BINDING 2); RNA binding
chr2	9272843	9273421	999	At2g21660	GRP7_GR-RBP7_ATGRP7_CCR2__ATGRP7 (COLD, CIRCADIAN RHYTHM, AND RNA BINDING 2); RNA binding
chr2	9395127	9395228	933	At2g22080	similar to zinc finger protein-related [Arabidopsis thaliana] (TAIR:AT5G63740.1); similar to unknown protein [Arabidopsis thaliana] (TAIR:AT2G11910.2); similar to calcium-binding protein [Brassica napus] (GB:AAD02824.1)
chr2	9480406	9480743	890	At2g22300	ethylene-responsive calmodulin-binding protein, putative (SR1)
chr2	9483239	9483646	998	At2g22300	ethylene-responsive calmodulin-binding protein, putative (SR1)
chr2	9636221	9636650	999	At2g22660	similar to glycine-rich protein [Arabidopsis thaliana] (TAIR:AT4G37900.1); similar to Protein of unknown function DUF1399 [Medicago truncatula] (GB:ABE84186.1); contains InterPro domain Protein of unknown function DUF1399; (InterPro:IPR009836)
chr2	9786298	9786558	983	At2g22980	SCPL13__SCPL13
chr2	10318378	10318807	991	At2g24240	potassium channel tetramerisation domain-containing protein
chr2	10318955	10319352	998	At2g24240	potassium channel tetramerisation domain-containing protein
chr2	10346694	10347235	917	At2g24290	similar to unknown protein [Arabidopsis thaliana] (TAIR:AT4G30996.1); similar to H0311C03.8 [Oryza sativa (indica cultivar-group)] (GB:CAH67554.1); contains InterPro domain Protein of unknown function DUF1068; (InterPro:IPR010471)
chr2	10899796	10900050	951	At2g25590	agenet domain-containing protein
chr2	11048951	11049863	999	At2g25900	ATCTH__ATCTH (Arabidopsis thaliana Cys3His zinc finger protein); transcription factor
chr2	11070006	11070179	919	At2g25940	ALPHA-VPE_ALPHAVPE__ALPHA-VPE (ALPHA-VACUOLAR PROCESSING ENZYME); cysteine-type endopeptidase
chr2	11256043	11256400	867	At2g26440	pectinesterase family protein
chr2	11300869	11301017	990	At2g26560	PLA2A_PLA IIA_PLP2_PLA IIA__PLP2 (PHOSPHOLIPASE A 2A); nutrient reservoir
chr2	11301278	11301637	999	At2g26560	PLA2A_PLA IIA_PLP2_PLA IIA__PLP2 (PHOSPHOLIPASE A 2A); nutrient reservoir
chr2	11302228	11302545	999	At2g26560	PLA2A_PLA IIA_PLP2_PLA IIA__PLP2 (PHOSPHOLIPASE A 2A); nutrient reservoir
chr2	11302655	11302838	987	At2g26560	PLA2A_PLA IIA_PLP2_PLA IIA__PLP2 (PHOSPHOLIPASE A 2A); nutrient reservoir
chr2	11372279	11372607	981	At2g26695	binding
chr2	11867659	11868398	999	At2g27830	similar to pentatricopeptide (PPR) repeat-containing protein [Arabidopsis thaliana] (TAIR:AT4G22760.1); similar to hypothetical protein [Catharanthus roseus] (GB:CAC09928.1)
chr2	12282431	12282783	918	At2g28630	beta-ketoacyl-CoA synthase family protein
chr2	12283070	12283484	996	At2g28630	beta-ketoacyl-CoA synthase family protein
chr2	12334240	12334676	999	At2g28720	histone H2B, putative
chr2	12385631	12385776	825	At2g28840	ankyrin repeat family protein
chr2	12386806	12387535	999	At2g28840	ankyrin repeat family protein
chr2	12689411	12689672	984	At2g29670	binding
chr2	12690478	12691092	999	At2g29670	binding
chr2	12691491	12691854	999	At2g29670	binding
chr2	12815965	12816254	996	At2g30010	similar to PMR5 (POWDERY MILDEW RESISTANT 5) [Arabidopsis thaliana] (TAIR:AT5G58600.1); similar to unknown [Pisum sativum] (GB:ABA29157.1); similar to unknown [Pisum sativum] (GB:ABA29158.1); similar to Os03g0290900 [Oryza sativa (japonica cultivar-group)] (GB:NP_001049797.1); contains InterPro domain Protein of unknown function DUF231, plant; (InterPro:IPR004253)
chr2	12980078	12980614	996	At2g30440	chloroplast thylakoidal processing peptidase
chr2	12982047	12982337	851	At2g30440	chloroplast thylakoidal processing peptidase
chr2	13009090	13009124	803	At2g30505	unknown protein
chr2	13044525	13045265	999	At2g30600	protein binding
chr2	13045442	13045725	998	At2g30600	protein binding
chr2	13045870	13046154	999	At2g30600	protein binding
chr2	13046401	13046582	993	At2g30600	protein binding
chr2	13047297	13047552	998	At2g30600	protein binding
chr2	13047943	13048702	999	At2g30600	protein binding
chr2	13052742	13053433	999	At2g30620	histone H1.2
chr2	13149108	13149676	999	At2g30870	ATGSTF10_ATGSTF4_ERD13__ATGSTF10 (EARLY DEHYDRATION-INDUCED 13); glutathione transferase
chr2	13453242	13453706	999	At2g31590	similar to unknown protein [Arabidopsis thaliana] (TAIR:AT4G04730.1)
chr2	13531314	13531556	989	At2g31810	acetolactate synthase small subunit, putative
chr2	13535261	13535399	970	At2g31810	acetolactate synthase small subunit, putative
chr2	13563443	13564020	993	At2g31880	leucine-rich repeat transmembrane protein kinase, putative
chr2	13667198	13667659	998	At2g32150	haloacid dehalogenase-like hydrolase family protein
chr2	14202432	14202676	897	At2g33510	unknown protein
chr2	14312560	14313058	996	At2g33810	SPL3__SPL3 (SQUAMOSA PROMOTER BINDING PROTEIN-LIKE 3); transcription factor
chr2	14316543	14317375	999	At2g33830	dormancy/auxin associated family protein
chr2	14531788	14532054	973	At2g34430	LHB1B1_LHCB1.4__LHB1B1 (Photosystem II light harvesting complex gene 1.4); chlorophyll binding
chr2	14532555	14532853	977	At2g34430	LHB1B1_LHCB1.4__LHB1B1 (Photosystem II light harvesting complex gene 1.4); chlorophyll binding
chr2	15236519	15237045	993	At2g36320	zinc finger (AN1-like) family protein
chr2	15276353	15276745	963	At2g36390	BE3_SBE2.1__SBE2.1 (STARCH BRANCHING ENZYME 2.1); 1,4-alpha-glucan branching enzyme
chr2	15277148	15277763	999	At2g36400	AtGRF3__AtGRF3 (GROWTH-REGULATING FACTOR 3)
chr2	15278567	15278937	995	At2g36400	AtGRF3__AtGRF3 (GROWTH-REGULATING FACTOR 3)
chr2	15676662	15677047	983	At2g37330	ALS3__ALS3 (ALUMINUM SENSITIVE 3)
chr2	15744150	15744433	987	At2g37480	similar to unknown protein [Arabidopsis thaliana] (TAIR:AT3G53670.1); similar to hypothetical protein MtrDRAFT_AC125368g26v1 [Medicago truncatula] (GB:ABE93949.1); similar to hypothetical protein MtrDRAFT_AC135797g8v1 [Medicago truncatula] (GB:ABE82095.1); contains InterPro domain Galactose-binding like; (InterPro:IPR008979)
chr2	15744983	15745451	999	At2g37480	similar to unknown protein [Arabidopsis thaliana] (TAIR:AT3G53670.1); similar to hypothetical protein MtrDRAFT_AC125368g26v1 [Medicago truncatula] (GB:ABE93949.1); similar to hypothetical protein MtrDRAFT_AC135797g8v1 [Medicago truncatula] (GB:ABE82095.1); contains InterPro domain Galactose-binding like; (InterPro:IPR008979)
chr2	15745707	15745958	999	At2g37480	similar to unknown protein [Arabidopsis thaliana] (TAIR:AT3G53670.1); similar to hypothetical protein MtrDRAFT_AC125368g26v1 [Medicago truncatula] (GB:ABE93949.1); similar to hypothetical protein MtrDRAFT_AC135797g8v1 [Medicago truncatula] (GB:ABE82095.1); contains InterPro domain Galactose-binding like; (InterPro:IPR008979)
chr2	15746343	15746839	999	At2g37480	similar to unknown protein [Arabidopsis thaliana] (TAIR:AT3G53670.1); similar to hypothetical protein MtrDRAFT_AC125368g26v1 [Medicago truncatula] (GB:ABE93949.1); similar to hypothetical protein MtrDRAFT_AC135797g8v1 [Medicago truncatula] (GB:ABE82095.1); contains InterPro domain Galactose-binding like; (InterPro:IPR008979)
chr2	16057798	16058056	992	At2g38310	similar to unknown protein [Arabidopsis thaliana] (TAIR:AT5G05440.1); similar to hypothetical protein [Nicotiana tabacum] (GB:CAI84653.1); contains InterPro domain Bet v I allergen; (InterPro:IPR000916)
chr2	16230204	16230352	872	At2g38820	similar to unknown protein [Arabidopsis thaliana] (TAIR:AT3G22970.1); similar to unknown protein [Oryza sativa (japonica cultivar-group)] (GB:AAP44687.1); similar to expressed protein [Oryza sativa (japonica cultivar-group)] (GB:AAT76408.1); similar to Os03g0796600 [Oryza sativa (japonica cultivar-group)] (GB:NP_001051556.1); contains InterPro domain Protein of unknown function DUF506, plant; (In…
chr2	16461416	16461559	985	At2g39400	hydrolase, alpha/beta fold family protein
chr2	16461634	16461800	917	At2g39400	hydrolase, alpha/beta fold family protein
chr2	16515852	16516140	999	At2g39570	ACT domain-containing protein
chr2	16516288	16516547	997	At2g39570	ACT domain-containing protein
chr2	16516671	16516981	999	At2g39570	ACT domain-containing protein
chr2	16667106	16667529	999	At2g39900	LIM domain-containing protein
chr2	16670078	16670385	992	At2g39920	acid phosphatase class B family protein
chr2	16670820	16671137	928	At2g39920	acid phosphatase class B family protein
chr2	16881340	16881665	989	At2g40410	Ca(2+)-dependent nuclease, putative
chr2	17276417	17277516	999	At2g41430	ERD15_CID1_LSR1__ERD15 (EARLY RESPONSIVE TO DEHYDRATION 15)
chr2	17551826	17552229	996	At2g42040	similar to hypothetical protein [Oryza sativa (japonica cultivar-group)] (GB:BAD35859.1)
chr2	17574418	17574600	879	At2g42130	similar to unknown protein [Arabidopsis thaliana] (TAIR:AT3G58010.1); similar to Os04g0665800 [Oryza sativa (japonica cultivar-group)] (GB:NP_001054180.1); similar to unknown [Vitis pseudoreticulata] (GB:ABC69760.1)
chr2	17737463	17737755	836	At2g42580	TTL3__TTL3 (TETRATRICOPETIDE-REPEAT THIOREDOXIN-LIKE 3); protein binding
chr2	17861221	17861532	998	At2g42900	similar to Os05g0582000 [Oryza sativa (japonica cultivar-group)] (GB:NP_001056435.1)
chr2	17894225	17894519	926	At2g43010	PIF4_SRL2__PIF4 (PHYTOCHROME INTERACTING FACTOR 4); DNA binding / transcription factor
chr2	17895386	17895999	999	At2g43010	PIF4_SRL2__PIF4 (PHYTOCHROME INTERACTING FACTOR 4); DNA binding / transcription factor
chr2	17902226	17902823	983	At2g43030	ribosomal protein L3 family protein
chr2	18077978	18078162	928	At2g43535	trypsin inhibitor, putative
chr2	18079784	18079923	804	At2g43540	similar to conserved hypothetical protein [Medicago truncatula] (GB:ABE91484.1)
chr2	18118173	18118790	998	At2g43680	IQD14__IQD14; calmodulin binding
chr2	18336648	18336795	892	At2g44410	protein binding / zinc ion binding
chr2	18373514	18373665	843	At2g44490	PEN2__PEN2 (PENETRATION 2); hydrolase, hydrolyzing O-glycosyl compounds
chr2	18374263	18374831	999	At2g44490	PEN2__PEN2 (PENETRATION 2); hydrolase, hydrolyzing O-glycosyl compounds
chr2	18533548	18533763	971	At2g44920	thylakoid lumenal 15 kDa protein, chloroplast
chr2	18632475	18632762	982	At2g45180	protease inhibitor/seed storage/lipid transfer protein (LTP) family protein
chr2	18633390	18634092	999	At2g45180	protease inhibitor/seed storage/lipid transfer protein (LTP) family protein
chr2	19086692	19086940	996	At2g46490	similar to unknown protein [Arabidopsis thaliana] (TAIR:AT5G35110.1)
chr2	19120062	19120289	830	At2g46550	similar to unknown protein [Arabidopsis thaliana] (TAIR:AT1G01240.3); similar to Os09g0363500 [Oryza sativa (japonica cultivar-group)] (GB:NP_001062992.1); similar to Os08g0400300 [Oryza sativa (japonica cultivar-group)] (GB:NP_001061754.1); similar to hypothetical protein MtrDRAFT_AC145165g14v1 [Medicago truncatula] (GB:ABE91800.1)
chr2	19120396	19120617	873	At2g46550	similar to unknown protein [Arabidopsis thaliana] (TAIR:AT1G01240.3); similar to Os09g0363500 [Oryza sativa (japonica cultivar-group)] (GB:NP_001062992.1); similar to Os08g0400300 [Oryza sativa (japonica cultivar-group)] (GB:NP_001061754.1); similar to hypothetical protein MtrDRAFT_AC145165g14v1 [Medicago truncatula] (GB:ABE91800.1)
chr2	19143130	19143567	997	At2g46600	calcium-binding protein, putative
chr2	19187958	19188400	847	At2g46690	auxin-responsive family protein
chr2	19278873	19279188	816	At2g46900	similar to PREDICTED: similar to CG7927-PA [Tribolium castaneum] (GB:XP_973489.1); similar to Os09g0514900 [Oryza sativa (japonica cultivar-group)] (GB:NP_001063663.1); contains InterPro domain Protein of unknown function DUF654; (InterPro:IPR006994); contains InterPro domain DNA polymerase beta, N-terminal-like; (InterPro:IPR010996)
chr2	19435680	19435963	920	At2g47320	peptidyl-prolyl cis-trans isomerase cyclophilin-type family protein
chr3	94270	94586	985	At3g01310	acid phosphatase
chr3	152844	152992	811	At3g01400	armadillo/beta-catenin repeat family protein
chr3	257981	258547	999	At3g01690	similar to unknown protein [Arabidopsis thaliana] (TAIR:AT5G14390.1); similar to Esterase/lipase/thioesterase [Medicago truncatula] (GB:ABD32255.1); contains InterPro domain Esterase/lipase/thioesterase; (InterPro:IPR000379); contains InterPro domain Alpha/beta hydrolase fold-1; (InterPro:IPR000073)
chr3	1356575	1356941	999	At3g04910	WNK1_ZIK4__WNK1 (WITH NO LYSINE (K) 1); kinase
chr3	1357197	1357779	999	At3g04910	WNK1_ZIK4__WNK1 (WITH NO LYSINE (K) 1); kinase
chr3	1937888	1938178	997	At3g06380	AtTLP9_ATTLP9__ATTLP9/AtTLP9 (TUBBY LIKE PROTEIN 9, TUBBY-LIKE PROTEIN 9); phosphoric diester hydrolase/ protein binding / transcription factor
chr3	2014469	2014683	939	At3g06500	beta-fructofuranosidase, putative / invertase, putative / saccharase, putative / beta-fructosidase, putative
chr3	2015213	2015565	991	At3g06500	beta-fructofuranosidase, putative / invertase, putative / saccharase, putative / beta-fructosidase, putative
chr3	2263429	2263693	951	At3g07140	GPI transamidase component Gpi16 subunit family protein
chr3	2298020	2298273	801	At3g07220	transcriptional activator, putative
chr3	2485612	2486143	992	At3g07780	protein binding / zinc ion binding
chr3	2486758	2486929	876	At3g07780	protein binding / zinc ion binding
chr3	2511718	2512106	914	At3g07870	F-box family protein
chr3	2713030	2713243	902	At3g08920	rhodanese-like domain-containing protein
chr3	3036361	3036578	801	At3g09900	AtRab8E_AtRABE1e__AtRABE1e/AtRab8E (Arabidopsis Rab GTPase homolog E1e); GTP binding
chr3	3091269	3091670	999	At3g10020	similar to Os12g0147200 [Oryza sativa (japonica cultivar-group)] (GB:NP_001066153.1); similar to Os11g0149200 [Oryza sativa (japonica cultivar-group)] (GB:NP_001065754.1)
chr3	3117800	3118084	998	At3g10113	myb family transcription factor
chr3	3637586	3637909	878	At3g11540	SPY__SPY (SPINDLY)
chr3	3728525	3728976	997	At3g11810	similar to unknown protein [Arabidopsis thaliana] (TAIR:AT2G03330.1); similar to conserved hypothetical protein [Medicago truncatula] (GB:ABE90086.1); similar to Os12g0257500 [Oryza sativa (japonica cultivar-group)] (GB:NP_001066512.1)
chr3	4012754	4013282	919	At3g12630	zinc finger (AN1-like) family protein
chr3	4186455	4186969	999	At3g13062	similar to unknown protein [Arabidopsis thaliana] (TAIR:AT1G55960.1); similar to Lipid-binding START [Medicago truncatula] (GB:ABE91086.1); contains InterPro domain Lipid-binding START; (InterPro:IPR002913)
chr3	4384066	4384319	837	At3g13450	DIN4__DIN4 (DARK INDUCIBLE 4); 3-methyl-2-oxobutanoate dehydrogenase (2-methylpropanoyl-transferring)
chr3	4493089	4493560	999	At3g13710	prenylated rab acceptor (PRA1) family protein
chr3	4515322	4516241	999	At3g13750	BGAL1__BGAL1 (BETA GALACTOSIDASE 1); beta-galactosidase
chr3	4773637	4773972	920	At3g14310	ATPME3__ATPME3 (Arabidopsis thaliana pectin methylesterase 3)
chr3	4774564	4774997	998	At3g14310	ATPME3__ATPME3 (Arabidopsis thaliana pectin methylesterase 3)
chr3	5021778	5022249	970	At3g14930	HEME1__HEME1; uroporphyrinogen decarboxylase
chr3	5117156	5117557	965	At3g15190	chloroplast 30S ribosomal protein S20, putative
chr3	5140014	5140273	872	At3g15260	protein phosphatase 2C, putative / PP2C, putative
chr3	5174474	5174821	999	At3g15356	legume lectin family protein
chr3	5174895	5175355	999	At3g15356	legume lectin family protein
chr3	5189230	5189546	973	At3g15360	ATM4_TRX-M4_ATHM4__ATHM4 (Arabidopsis thioredoxin M-type 4); thiol-disulfide exchange intermediate
chr3	5213054	5213218	939	At3g15450	similar to unknown protein [Arabidopsis thaliana] (TAIR:AT4G27450.1); similar to unknown [Glycine max] (GB:AAG00940.1); contains domain no description (G3D.3.60.20.10); contains domain N-terminal nucleophile aminohydrolases (Ntn hydrolases) (SSF56235)
chr3	5213325	5214099	999	At3g15450	similar to unknown protein [Arabidopsis thaliana] (TAIR:AT4G27450.1); similar to unknown [Glycine max] (GB:AAG00940.1); contains domain no description (G3D.3.60.20.10); contains domain N-terminal nucleophile aminohydrolases (Ntn hydrolases) (SSF56235)
chr3	5235477	5235959	999	At3g15500	ANAC055_ATNAC3__ATNAC3 (ARABIDOPSIS NAC DOMAIN CONTAINING PROTEIN 55); transcription factor
chr3	5296903	5297116	880	At3g15630	similar to unknown protein [Arabidopsis thaliana] (TAIR:AT1G52720.1); similar to conserved hypothetical protein [Medicago truncatula] (GB:ABE92597.1)
chr3	5297303	5297599	999	At3g15630	similar to unknown protein [Arabidopsis thaliana] (TAIR:AT1G52720.1); similar to conserved hypothetical protein [Medicago truncatula] (GB:ABE92597.1)
chr3	5624425	5624743	998	At3g15630	similar to unknown protein [Arabidopsis thaliana] (TAIR:AT1G52720.1); similar to conserved hypothetical protein [Medicago truncatula] (GB:ABE92597.1)
chr3	5625175	5625355	979	At3g16530	legume lectin family protein
chr3	5758320	5758797	998	At3g16857	ARR1__ARR1 (ARABIDOPSIS RESPONSE REGULATOR 1); transcription factor/ two-component response regulator
chr3	5831468	5831869	991	At3g17100	transcription factor
chr3	5831940	5832401	999	At3g17100	transcription factor
chr3	6040263	6040442	929	At3g17670	binding
chr3	6170531	6171016	993	At3g18035	HON4__HON4; DNA binding
chr3	6171418	6171631	869	At3g18035	HON4__HON4; DNA binding
chr3	6193140	6193639	998	At3g18080	glycosyl hydrolase family 1 protein
chr3	6309859	6310329	989	At3g18370	ATSYTF_NTMCTYPE3_SYTF__C2 domain-containing protein
chr3	6373535	6373679	965	At3g18530	binding
chr3	6688334	6688806	995	At3g19290	ABF4_AREB2__ABF4 (ABRE BINDING FACTOR 4); DNA binding / transcription factor/ transcriptional activator
chr3	6905697	6906056	999	At3g19860	DNA binding
chr3	6927058	6927342	972	At3g19910	zinc finger (C3HC4-type RING finger) family protein
chr3	6935900	6936965	999	At3g19930	STP4__STP4 (SUGAR TRANSPORTER 4); carbohydrate transporter/ sugar porter
chr3	7118812	7118987	930	At3g20410	CPK9__CPK9 (CALMODULIN-DOMAIN PROTEIN KINASE 9); calcium- and calmodulin-dependent protein kinase/ kinase
chr3	7917943	7918709	999	At3g22380	TIC__similar to unknown protein [Arabidopsis thaliana] (TAIR:AT3G63180.1); similar to Os07g0571100 [Oryza sativa (japonica cultivar-group)] (GB:NP_001060049.1); similar to unknown protein [Oryza sativa (japonica cultivar-group)] (GB:BAC84664.1)
chr3	8260678	8260684	926	At3g23160	similar to unknown protein [Arabidopsis thaliana] (TAIR:AT5G51670.1); similar to P0650D04.6 [Oryza sativa (japonica cultivar-group)] (GB:CAI44602.1); contains InterPro domain Protein of unknown function DUF668; (InterPro:IPR007700)
chr3	8323611	8324160	996	At3g23280	zinc finger (C3HC4-type RING finger) family protein / ankyrin repeat family protein
chr3	8421496	8421943	954	At3g23480	cyclopropane fatty acid synthase-related
chr3	8422382	8422603	845	At3g23480	cyclopropane fatty acid synthase-related
chr3	8479570	8479716	917	At3g23610	dual specificity protein phosphatase (DsPTP1)
chr3	9132865	9133596	999	At3g25070	RIN4__RIN4 (RPM1 INTERACTING PROTEIN 4)
chr3	9491911	9492098	959	At3g25920	RPL15__RPL15 (ribosomal protein L15)
chr3	9517599	9517854	808	At3g26020	protein phosphatase type 2A regulator
chr3	9520239	9520672	855	At3g26020	protein phosphatase type 2A regulator
chr3	9590592	9591090	999	At3g26200	CYP71B22__CYP71B22 (cytochrome P450, family 71, subfamily B, polypeptide 22); oxygen binding
chr3	9591200	9591406	913	At3g26200	CYP71B22__CYP71B22 (cytochrome P450, family 71, subfamily B, polypeptide 22); oxygen binding
chr3	9591766	9592184	999	At3g26200	CYP71B22__CYP71B22 (cytochrome P450, family 71, subfamily B, polypeptide 22); oxygen binding
chr3	9761372	9761632	991	At3g26580	binding
chr3	9829121	9829860	999	At3g26740	CCL__CCL (CCR-LIKE)
chr3	10018864	10019076	908	At3g27160	GHS1__GHS1 (GLUCOSE HYPERSENSITIVE 1); structural constituent of ribosome
chr3	10073134	10073386	818	At3g27260	GTE8__GTE8 (GLOBAL TRANSCRIPTION FACTOR GROUP E8); DNA binding
chr3	10123931	10124196	855	At3g27340	similar to Os01g0904300 [Oryza sativa (japonica cultivar-group)] (GB:NP_001045122.1); similar to Os02g0197800 [Oryza sativa (japonica cultivar-group)] (GB:NP_001046202.1); similar to B1065G12.33 [Oryza sativa (japonica cultivar-group)] (GB:BAB90551.1); contains InterPro domain Protein of unknown function DUF971; (InterPro:IPR010376)
chr3	11257443	11257660	996	At3g29320	glucan phosphorylase, putative
chr3	11279887	11280066	946	At3g29370	similar to unknown protein [Arabidopsis thaliana] (TAIR:AT5G39240.1); contains InterPro domain Helix-loop-helix DNA-binding; (InterPro:IPR011598)
chr3	11322863	11322915	962	At3g29440	copia-like retrotransposon family,
chr3	11512472	11512815	971	At3g29647=utr3=int=At3g29648=p800	intergenic transcript
chr3	12352069	12352278	945	At3g30720	unknown protein
chr3	12451828	12452422	999	At3g30775	PRODH_ERD5_ATPDH_ATPOX_AT-POX_PRO1__ERD5 (EARLY RESPONSIVE TO DEHYDRATION 5, PROLINE OXIDASE); proline dehydrogenase
chr3	12453026	12453312	979	At3g30775	PRODH_ERD5_ATPDH_ATPOX_AT-POX_PRO1__ERD5 (EARLY RESPONSIVE TO DEHYDRATION 5, PROLINE OXIDASE); proline dehydrogenase
chr3	13494225	13494486	889	At3g32930	similar to Os07g0608100 [Oryza sativa (japonica cultivar-group)] (GB:NP_001060239.1)
chr3	13592633	13592670	886	At3g33055=utr3=int=At3g33058=p800	intergenic transcript associated with smRNAs and repeats
chr3	13592976	13593026	986	At3g33055=utr3=int=At3g33058=p800	intergenic transcript associated with smRNAs and repeats
chr3	13594128	13594142	817	At3g33055=utr3=int=At3g33058=p800	intergenic transcript associated with smRNAs and repeats
chr3	13594306	13594320	817	At3g33055=utr3=int=At3g33058=p800	intergenic transcript associated with smRNAs and repeats
chr3	13594468	13594505	884	At3g33055=utr3=int=At3g33058=p800	intergenic transcript associated with smRNAs and repeats
chr3	13595196	13595210	817	At3g33055=utr3=int=At3g33058=p800	intergenic transcript associated with smRNAs and repeats
chr3	14968000	14968113	999	At3g42883	copia-like retrotransposon family,
chr3	14972982	14973095	999	At3g42883	copia-like retrotransposon family,
chr3	15714597	15714811	907	At3g43850	unknown protein
chr3	15829109	15829223	999	At3g44045	copia-like retrotransposon family,
chr3	16050074	16050155	999	At3g44390	copia-like retrotransposon family,
chr3	16077884	16078006	996	At3g44425=utr3=int=At3g44430=p800	intergenic transcript
chr3	16369406	16369651	987	At3g44810	F-box family protein
chr3	16874354	16874682	999	At3g45860	receptor-like protein kinase, putative
chr3	16894396	16894610	973	At3g45930	histone H4
chr3	16908477	16908701	961	At3g45970	ATEXLA1_ATEXPL1_ATHEXP BETA 2.1_EXPL1__ATEXLA1 (ARABIDOPSIS THALIANA EXPANSIN-LIKE A1)
chr3	17371230	17371403	870	At3g47160	protein binding / zinc ion binding
chr3	17449070	17449503	999	At3g47340	ASN1_DIN6__ASN1 (DARK INDUCIBLE 6)
chr3	17449573	17449755	997	At3g47340	ASN1_DIN6__ASN1 (DARK INDUCIBLE 6)
chr3	17449904	17450009	905	At3g47340	ASN1_DIN6__ASN1 (DARK INDUCIBLE 6)
chr3	17450076	17450395	999	At3g47340	ASN1_DIN6__ASN1 (DARK INDUCIBLE 6)
chr3	17450574	17450678	980	At3g47340	ASN1_DIN6__ASN1 (DARK INDUCIBLE 6)
chr3	17450785	17451070	999	At3g47340	ASN1_DIN6__ASN1 (DARK INDUCIBLE 6)
chr3	17451964	17452191	999	At3g47340	ASN1_DIN6__ASN1 (DARK INDUCIBLE 6)
chr3	17645943	17646089	954	At3g47800	aldose 1-epimerase family protein
chr3	17647498	17648014	999	At3g47800	aldose 1-epimerase family protein
chr3	17917354	17917707	988	At3g48350	cysteine proteinase, putative
chr3	17920529	17920858	854	At3g48360	BT2__BT2 (BTB and TAZ domain protein 2); protein binding / transcription regulator
chr3	17933949	17934318	999	At3g48390	MA3 domain-containing protein
chr3	17998507	17998683	991	At3g48530	KING1__CBS domain-containing protein
chr3	18000036	18000678	999	At3g48530	KING1__CBS domain-containing protein
chr3	18061528	18061999	997	At3g48730	GSA2__GSA2 (GLUTAMATE-1-SEMIALDEHYDE 2,1-AMINOMUTASE 2); glutamate-1-semialdehyde 2,1-aminomutase
chr3	18213833	18214013	827	At3g49110	ATPCA_ATPRX33_PRX33_PRXCA__ATPCA/ATPRX33/PRX33/PRXCA (PEROXIDASE 33); peroxidase
chr3	18276257	18276803	993	At3g49260	IQD21__IQD21 (IQ-domain 21); calmodulin binding
chr3	18380994	18381239	959	At3g49550	unknown protein
chr3	18390908	18391234	992	At3g49590	similar to unknown protein [Arabidopsis thaliana] (TAIR:AT3G18770.1); similar to IMP dehydrogenase/GMP reductase [Medicago truncatula] (GB:ABE83766.1)
chr3	18744149	18744681	999	At3g50480	HR4__HR4 (HOMOLOG OF RPW8 4)
chr3	18744898	18745109	999	At3g50480	HR4__HR4 (HOMOLOG OF RPW8 4)
chr3	18745228	18745340	999	At3g50480	HR4__HR4 (HOMOLOG OF RPW8 4)
chr3	18750210	18750323	999	At3g50490	copia-like retrotransposon family
chr3	18752578	18753014	999	At3g50500	SNRK2-2_SNRK2.2_SPK-2-2_SRK2D_SPK-2-2__SPK-2-2 (SNF1-RELATED PROTEIN KINASE 2-2, SNF1-RELATED PROTEIN KINASE 2.2); kinase/ protein kinase
chr3	18853271	18853765	999	At3g50700	ATIDD2__ATIDD2 (ARABIDOPSIS THALIANA INDETERMINATE(ID)-DOMAIN 2); nucleic acid binding / transcription factor/ zinc ion binding
chr3	18884994	18885705	999	At3g50700	ATIDD2__ATIDD2 (ARABIDOPSIS THALIANA INDETERMINATE(ID)-DOMAIN 2); nucleic acid binding / transcription factor/ zinc ion binding
chr3	19062183	19062436	817	At3g51330	aspartyl protease family protein
chr3	19064602	19064749	857	At3g51330	aspartyl protease family protein
chr3	19322203	19322674	989	At3g52060	similar to unknown protein [Arabidopsis thaliana] (TAIR:AT5G22070.1); similar to Protein of unknown function DUF266, plant [Medicago truncatula] (GB:ABE91847.1); similar to Os03g0648100 [Oryza sativa (japonica cultivar-group)] (GB:NP_001050776.1); similar to Protein of unknown function DUF266, plant [Medicago truncatula] (GB:ABE78946.1); contains InterPro domain Protein of unknown function DUF266…
chr3	19596671	19596856	826	At3g52840	BGAL2__beta-galactosidase, putative / lactase, putative
chr3	19596960	19597207	968	At3g52840	BGAL2__beta-galactosidase, putative / lactase, putative
chr3	19923481	19923857	994	At3g53730	histone H4
chr3	19943232	19943885	999	At3g53800	armadillo/beta-catenin repeat family protein
chr3	20208425	20208605	897	At3g54560	HTA11__histone H2A.F/Z
chr3	20356520	20357250	999	At3g54920	PMR6__PMR6 (POWDERY MILDEW RESISTANT 6); lyase/ pectate lyase
chr3	20570555	20571033	999	At3g55450	protein kinase, putative
chr3	21024142	21024324	981	At3g56720	similar to unknown protein [Arabidopsis thaliana] (TAIR:AT2G44200.1); similar to putative small ribonucleoprotein [Oryza sativa] (GB:AAL31070.1)
chr3	21140790	21141046	959	At3g57090	BIGYIN__binding
chr3	21199553	21199801	937	At3g57260	BGL2_BG2_PR2_PR-2__BGL2 (PATHOGENESIS-RELATED PROTEIN 2); glucan 1,3-beta-glucosidase/ hydrolase, hydrolyzing O-glycosyl compounds
chr3	21199971	21200367	998	At3g57260	BGL2_BG2_PR2_PR-2__BGL2 (PATHOGENESIS-RELATED PROTEIN 2); glucan 1,3-beta-glucosidase/ hydrolase, hydrolyzing O-glycosyl compounds
chr3	21299831	21300289	999	At3g57520	ATSIP2__ATSIP2 (ARABIDOPSIS THALIANA SEED IMBIBITION 2); hydrolase, hydrolyzing O-glycosyl compounds
chr3	21301313	21301816	999	At3g57520	ATSIP2__ATSIP2 (ARABIDOPSIS THALIANA SEED IMBIBITION 2); hydrolase, hydrolyzing O-glycosyl compounds
chr3	21719508	21719836	998	At3g58680	ATMBF1B_MBF1B__ATMBF1B/MBF1B (MULTIPROTEIN BRIDGING FACTOR 1B); DNA binding / transcription coactivator
chr3	22255587	22255915	970	At3g60190	ADL4_ADLP2_DRP1E_EDR3__ADL4/ADLP2/DRP1E/EDR3 (DYNAMIN-LIKE PROTEIN 4); GTP binding / GTPase
chr3	22384320	22384933	999	At3g60530	zinc finger (GATA type) family protein
chr3	22409953	22410501	817	At3g60590	DNA binding
chr3	22501984	22502498	833	At3g60860	guanine nucleotide exchange family protein
chr3	22611606	22612055	969	At3g61050	NTMCTYPE4__lipid binding
chr3	22614039	22614364	999	At3g61060	ATPP2-A13__ATPP2-A13
chr3	22614432	22615224	999	At3g61060	ATPP2-A13__ATPP2-A13
chr3	22615295	22615548	999	At3g61060	ATPP2-A13__ATPP2-A13
chr3	22670139	22670393	956	At3g61210	embryo-abundant protein-related
chr3	22687453	22687662	910	At3g61260	DNA-binding family protein / remorin family protein
chr3	22694267	22694681	992	At3g61280	unknown protein
chr3	22797913	22798549	971	At3g61580	delta-8 sphingolipid desaturase (SLD1)
chr3	22808377	22808915	998	At3g61600	ATPOB1__ATPOB1 (Arabidopsis thaliana POZ/BTB containing-protein 1); protein binding
chr3	23147200	23147520	999	At3g62550	universal stress protein (USP) family protein
chr3	23147777	23147849	913	At3g62550	universal stress protein (USP) family protein
chr3	23147953	23148096	950	At3g62550	universal stress protein (USP) family protein
chr3	23179603	23179926	892	At3g62650	binding
chr3	23185192	23185615	951	At3g62660	GATL7__GATL7 (Galacturonosyltransferase-like 7); polygalacturonate 4-alpha-galacturonosyltransferase/ transferase, transferring glycosyl groups / transferase, transferring hexosyl groups
chr3	23277217	23277740	999	At3g62950	glutaredoxin family protein
chr3	23295285	23295682	866	At3g63000	NPL41__NPL4 family protein
chr3	23365243	23365673	986	At3g63210	MARD1__MARD1 (MEDIATOR OF ABA-REGULATED DORMANCY 1)
chr3	23429363	23429580	992	At3g63420	AGG1__AGG1 (ARABIDOPSIS GGAMMA-SUBUNIT 1)
chr4	155402	155869	999	At4g00355	similar to unknown protein [Arabidopsis thaliana] (TAIR:AT2G45980.1); similar to conserved hypothetical protein [Medicago truncatula] (GB:ABE80179.1)
chr4	335674	336422	999	At4g00780	meprin and TRAF homology domain-containing protein / MATH domain-containing protein
chr4	487464	487991	997	At4g01130	acetylesterase, putative
chr4	696682	697053	985	At4g01610	cathepsin B-like cysteine protease, putative
chr4	736359	736584	927	At4g01710	CRK_ARPC5__CRK (CROOKED)
chr4	1042432	1043083	999	At4g02370	similar to unknown protein [Arabidopsis thaliana] (TAIR:AT1G02816.1); similar to Os05g0362300 [Oryza sativa (japonica cultivar-group)] (GB:NP_001055314.1); similar to Protein of unknown function, DUF538 [Oryza sativa (japonica cultivar-group)] (GB:AAX95409.1); similar to Os05g0362500 [Oryza sativa (japonica cultivar-group)] (GB:NP_001055315.1); contains InterPro domain Protein of unknown function…
chr4	1073114	1073735	996	At4g02440	EID1__EID1 (EMPFINDLICHER IM DUNKELROTEN LICHT 1)
chr4	1110598	1110813	970	At4g02520	ATGSTF2_ATPM24_GST2__ATGSTF2 (Arabidopsis thaliana Glutathione S-transferase (class phi) 2); glutathione transferase
chr4	1111405	1111575	829	At4g02520	ATGSTF2_ATPM24_GST2__ATGSTF2 (Arabidopsis thaliana Glutathione S-transferase (class phi) 2); glutathione transferase
chr4	1557839	1558626	999	At4g03510	RMA1__RMA1 (Ring finger protein with Membrane Anchor 1); protein binding / ubiquitin-protein ligase/ zinc ion binding
chr4	2593784	2594040	965	At4g05070	similar to wound induced protein-like [Vitis vinifera] (GB:AAO12870.1)
chr4	2660443	2660592	931	At4g05150	octicosapeptide/Phox/Bem1p (PB1) domain-containing protein
chr4	2661765	2662495	999	At4g05150	octicosapeptide/Phox/Bem1p (PB1) domain-containing protein
chr4	2920867	2920890	931	At4g05610=utr3=int=At4g05613=utr3	intergenic transcript associated with smRNAs and repeats
chr4	2929227	2929252	951	At4g05610=utr3=int=At4g05613=utr3	intergenic transcript associated with smRNAs and repeats
chr4	2930829	2930854	936	At4g05610=utr3=int=At4g05613=utr3	intergenic transcript associated with smRNAs and repeats
chr4	2932431	2932456	951	At4g05610=utr3=int=At4g05613=utr3	intergenic transcript associated with smRNAs and repeats
chr4	2934033	2934058	936	At4g05610=utr3=int=At4g05613=utr3	intergenic transcript associated with smRNAs and repeats
chr4	2935635	2935660	951	At4g05610=utr3=int=At4g05613=utr3	intergenic transcript associated with smRNAs and repeats
chr4	2949993	2950020	987	At4g05610=utr3=int=At4g05613=utr3	intergenic transcript associated with smRNAs and repeats
chr4	2953195	2953220	875	At4g05610=utr3=int=At4g05613=utr3	intergenic transcript associated with smRNAs and repeats
chr4	3223376	3223385	844	At4g06510=utr3=int=At4g06511=p800	intergenic transcript associated with smRNAs and repeats
chr4	3228271	3228280	835	At4g06510=utr3=int=At4g06511=p800	intergenic transcript associated with smRNAs and repeats
chr4	3254474	3254487	844	At4g06510=utr3=int=At4g06511=p800	intergenic transcript associated with smRNAs and repeats
chr4	3257009	3257022	961	At4g06510=utr3=int=At4g06511=p800	intergenic transcript associated with smRNAs and repeats
chr4	3259593	3259614	976	At4g06510=utr3=int=At4g06511=p800	intergenic transcript associated with smRNAs and repeats
chr4	3950847	3950901	848	At4g06700=p200	intergenic transcript associated with smRNAs and repeats
chr4	3951729	3951780	980	At4g06700=p800	intergenic transcript associated with smRNAs and repeats
chr4	3952447	3952507	818	At4g06700=p800=int=At4g06702=utr3	intergenic transcript associated with smRNAs and repeats
chr4	3952805	3952848	946	At4g06700=p800=int=At4g06702=utr3	intergenic transcript associated with smRNAs and repeats
chr4	3953267	3953381	997	At4g06700=p800=int=At4g06702=utr3	intergenic transcript associated with smRNAs and repeats
chr4	3953514	3953574	979	At4g06700=p800=int=At4g06702=utr3	intergenic transcript associated with smRNAs and repeats
chr4	3953865	3953915	899	At4g06700=p800=int=At4g06702=utr3	intergenic transcript associated with smRNAs and repeats
chr4	3954582	3954642	963	At4g06700=p800=int=At4g06702=utr3	intergenic transcript associated with smRNAs and repeats
chr4	3955116	3955208	967	At4g06700=p800=int=At4g06702=utr3	intergenic transcript associated with smRNAs and repeats
chr4	3955295	3955378	992	At4g06700=p800=int=At4g06702=utr3	intergenic transcript associated with smRNAs and repeats
chr4	3955823	3955874	998	At4g06700=p800=int=At4g06702=utr3	intergenic transcript associated with smRNAs and repeats
chr4	3966559	3966616	962	At4g06708=p800	intergenic transcript associated with smRNAs and repeats
chr4	3967805	3967826	884	At4g06708=p800=int=At4g06710=utr3	intergenic transcript associated with smRNAs and repeats
chr4	3968301	3968350	977	At4g06708=p800=int=At4g06710=utr3	intergenic transcript associated with smRNAs and repeats
chr4	3974790	3974829	803	At4g06708=p800=int=At4g06710=utr3	intergenic transcript associated with smRNAs and repeats
chr4	3975005	3975049	950	At4g06708=p800=int=At4g06710=utr3	intergenic transcript associated with smRNAs and repeats
chr4	3977636	3977674	837	At4g06708=p800=int=At4g06710=utr3	intergenic transcript associated with smRNAs and repeats
chr4	3977814	3977868	997	At4g06708=p800=int=At4g06710=utr3	intergenic transcript associated with smRNAs and repeats
chr4	3983684	3983724	899	At4g06708=p800=int=At4g06710=utr3	intergenic transcript associated with smRNAs and repeats
chr4	3999476	3999516	899	At4g06716=p800=int=At4g06718=utr3	intergenic transcript associated with smRNAs and repeats
chr4	4000048	4000090	880	At4g06716=p800=int=At4g06718=utr3	intergenic transcript associated with smRNAs and repeats
chr4	4002716	4002758	913	At4g06716=p800=int=At4g06718=utr3	intergenic transcript associated with smRNAs and repeats
chr4	4003964	4003980	813	At4g06716=p800=int=At4g06718=utr3	intergenic transcript associated with smRNAs and repeats
chr4	4645070	4645329	978	At4g07825	unknown protein
chr4	5326392	5326569	998	At4g08405	copia-like retrotransposon family
chr4	5331421	5331608	999	At4g08405	copia-like retrotransposon family
chr4	6190463	6190744	838	At4g09830	similar to unknown protein [Arabidopsis thaliana] (TAIR:AT5G64780.1); similar to conserved hypothetical protein [Medicago truncatula] (GB:ABE81201.1); contains InterPro domain Tetraspanin; (InterPro:IPR008952)
chr4	6559045	6559267	881	At4g10610	CID12_RBP37__RBP37 (RNA-BINDING PROTEIN 37); RNA binding
chr4	6668656	6668822	937	At4g10845=utr3=int=At4g10850=p800	intergenic
chr4	6906062	6906463	999	At4g11360	RHA1B__RHA1B (RING-H2 finger A1B); protein binding / zinc ion binding
chr4	6906566	6906765	940	At4g11360	RHA1B__RHA1B (RING-H2 finger A1B); protein binding / zinc ion binding
chr4	6907722	6908113	996	At4g11370	RHA1A__RHA1A (RING-H2 finger A1A); protein binding / zinc ion binding
chr4	7359458	7359555	999	At4g12426	copia-like retrotransposon family
chr4	7364425	7364506	997	At4g12426	copia-like retrotransposon family
chr4	7816820	7816968	999	At4g13455	copia-like retrotransposon family
chr4	7821625	7821717	999	At4g13455	copia-like retrotransposon family
chr4	8011529	8011927	999	At4g13830	J20__J20 (DNAJ-LIKE 20); heat shock protein binding
chr4	8012477	8012755	982	At4g13830	J20__J20 (DNAJ-LIKE 20); heat shock protein binding
chr4	8218439	8218734	999	At4g14270	Protein containing PAM2 motif which mediates interaction with the PABC domain of polyadenyl binding proteins.
chr4	8218890	8219143	999	At4g14270	Protein containing PAM2 motif which mediates interaction with the PABC domain of polyadenyl binding proteins.
chr4	8336619	8337007	998	At4g14500	similar to unknown protein [Arabidopsis thaliana] (TAIR:AT3G23080.1); similar to putative membrane related protein CP5 [Oryza sativa (japonica cultivar-group)] (GB:BAC83004.1); contains InterPro domain Lipid-binding START; (InterPro:IPR002913)
chr4	8380145	8380371	836	At4g14605	mitochondrial transcription termination factor-related / mTERF-related
chr4	8517158	8517758	999	At4g14870	protein translocase
chr4	9061036	9061329	993	At4g15990	unknown protein
chr4	9061473	9061647	859	At4g15990	unknown protein
chr4	9063877	9064431	999	At4g16000	similar to unknown protein [Arabidopsis thaliana] (TAIR:AT4G15990.1)
chr4	9067867	9067976	834	At4g16000=p800=int=At4g16010=p800	intergenic transcript
chr4	9068238	9068346	807	At4g16010=p800	intergenic transcript
chr4	9142525	9142670	815	At4g16146	similar to unknown protein [Arabidopsis thaliana] (TAIR:AT1G69510.2); similar to negatively light-regulated protein, putative, expressed [Oryza sativa (japonica cultivar-group)] (GB:ABA97694.2); contains InterPro domain Lg106-like; (InterPro:IPR012482)
chr4	9284804	9284915	999	At4g16460=p800	intergenic
chr4	9413725	9414116	997	At4g16745	exostosin family protein
chr4	9575472	9575503	941	At4g17005	copia-like retrotransposon family
chr4	9866217	9866503	994	At4g17730	SYP23__SYP23 (syntaxin 23)
chr4	9866704	9866948	966	At4g17730	SYP23__SYP23 (syntaxin 23)
chr4	9947502	9947870	998	At4g17900	zinc-binding family protein
chr4	10040559	10041131	999	At4g18120	AML3__AML3 (ARABIDOPSIS MEI2-LIKE); RNA binding
chr4	10041934	10042167	976	At4g18120	AML3__AML3 (ARABIDOPSIS MEI2-LIKE); RNA binding
chr4	10070832	10070877	955	At4g18197	gene AT4G18200/ATPUP7 function Member of a family of proteins related to PUP1, a purine transporter. May be involved in the transport of purine and purine derivatives such as cytokinins, across the plasma membrane.
chr4	10072055	10073086	999	At4g18197	gene AT4G18200/ATPUP7 function Member of a family of proteins related to PUP1, a purine transporter. May be involved in the transport of purine and purine derivatives such as cytokinins, across the plasma membrane.
chr4	10074016	10074432	999	At4g18205	unknown protein
chr4	10074506	10075025	999	At4g18205	unknown protein
chr4	10091319	10091905	999	At4g18250	receptor serine/threonine kinase, putative
chr4	10298853	10299264	999	At4g18710	BIN2_DWF12_UCU1__BIN2 (BRASSINOSTEROID-INSENSITIVE 2); kinase
chr4	10371688	10371982	957	At4g18930	cyclic phosphodiesterase
chr4	10477393	10477806	999	At4g19160	binding
chr4	10479015	10479228	992	At4g19160	binding
chr4	10479873	10480070	986	At4g19160	binding
chr4	10904539	10904652	999	At4g20180	copia-like retrotransposon family
chr4	11107453	11108010	999	At4g20720	dentin sialophosphoprotein-related
chr4	11150995	11151286	821	At4g20820	FAD-binding domain-containing protein
chr4	11458803	11458985	915	At4g21540	Encodes a putative sphingosine kinase (SphK) containing the five conserved domains (C1-C5) previously identified in SphKs. product diacylglycerol kinase go_process protein kinase C
chr4	11575084	11575519	973	At4g21810	DER2.1__Der1-like family protein / degradation in the ER-like family protein
chr4	11844495	11844738	983	At4g22485	Encodes a Protease inhibitor/seed storage/LTP family protein
chr4	11849746	11850222	999	At4g22490	protease inhibitor/seed storage/lipid transfer protein (LTP) family protein
chr4	11854941	11855329	999	At4g22510	unknown protein
chr4	11856763	11857125	999	At4g22510	unknown protein
chr4	11858759	11859108	999	At4g22520	protease inhibitor/seed storage/lipid transfer protein (LTP) family protein
chr4	11930210	11930765	999	At4g22690	CYP706A1__CYP706A1 (cytochrome P450, family 706, subfamily A, polypeptide 1); oxygen binding
chr4	11930835	11931604	999	At4g22690	CYP706A1__CYP706A1 (cytochrome P450, family 706, subfamily A, polypeptide 1); oxygen binding
chr4	11935288	11935863	999	At4g22710	CYP706A2__CYP706A2 (cytochrome P450, family 706, subfamily A, polypeptide 2); oxygen binding
chr4	11935933	11936375	998	At4g22710	CYP706A2__CYP706A2 (cytochrome P450, family 706, subfamily A, polypeptide 2); oxygen binding
chr4	11936411	11936596	963	At4g22710	CYP706A2__CYP706A2 (cytochrome P450, family 706, subfamily A, polypeptide 2); oxygen binding
chr4	12123499	12123789	996	At4g23140	CRK6_RLK5__CRK6 (CYSTEINE-RICH RLK 6)
chr4	12123866	12124006	959	At4g23140	CRK6_RLK5__CRK6 (CYSTEINE-RICH RLK 6)
chr4	12173468	12173726	965	At4g23270	protein kinase family protein
chr4	12351267	12351549	902	At4g23710	(VACUOLAR ATP SYNTHASE SUBUNIT G 2, VACUOLAR ATP SYNTHASE SUBUNIT G2); unknown protein
chr4	12414563	12414786	987	At4g23870	similar to unknown protein [Arabidopsis thaliana] (TAIR:AT4G11020.1)
chr4	12783129	12783535	978	At4g24800	MA3 domain-containing protein
chr4	12783840	12784907	999	At4g24800	MA3 domain-containing protein
chr4	12884416	12884598	999	At4g25100	FSD1__FSD1 (FE SUPEROXIDE DISMUTASE 1); iron superoxide dismutase
chr4	12884670	12884738	872	At4g25100	FSD1__FSD1 (FE SUPEROXIDE DISMUTASE 1); iron superoxide dismutase
chr4	12885236	12885421	993	At4g25100	FSD1__FSD1 (FE SUPEROXIDE DISMUTASE 1); iron superoxide dismutase
chr4	13026735	13027106	998	At4g25500	ATRSP35_ATRSP40_AT-SRP40__ATRSP35 (Arabidopsis thaliana arginine/serine-rich splicing factor 35)
chr4	13392627	13392991	809	At4g26530	fructose-bisphosphate aldolase
chr4	13725619	13725763	968	At4g27440	PORB__PORB (PROTOCHLOROPHYLLIDE OXIDOREDUCTASE B); oxidoreductase/ protochlorophyllide reductase
chr4	13725916	13726430	999	At4g27440	PORB__PORB (PROTOCHLOROPHYLLIDE OXIDOREDUCTASE B); oxidoreductase/ protochlorophyllide reductase
chr4	13726502	13727284	999	At4g27440	PORB__PORB (PROTOCHLOROPHYLLIDE OXIDOREDUCTASE B); oxidoreductase/ protochlorophyllide reductase
chr4	13728149	13728331	926	At4g27450	similar to unknown protein [Arabidopsis thaliana] (TAIR:AT3G15450.1); similar to unknown [Glycine max] (GB:AAG00940.1); contains domain no description (G3D.3.60.20.10); contains domain N-terminal nucleophile aminohydrolases (Ntn hydrolases) (SSF56235)
chr4	13728473	13728835	999	At4g27450	similar to unknown protein [Arabidopsis thaliana] (TAIR:AT3G15450.1); similar to unknown [Glycine max] (GB:AAG00940.1); contains domain no description (G3D.3.60.20.10); contains domain N-terminal nucleophile aminohydrolases (Ntn hydrolases) (SSF56235)
chr4	13841117	13841443	800	At4g27745	unknown protein
chr4	13941446	13941881	999	At4g28040	nodulin MtN21 family protein
chr4	13942104	13942214	855	At4g28040	nodulin MtN21 family protein
chr4	14181839	14182162	835	At4g28715	myosin heavy chain, putative
chr4	14254251	14254415	985	At4g28880	CKL3__CKL3 (Casein Kinase I-like 3); casein kinase I/ kinase
chr4	14348841	14349020	941	At4g29110	unknown protein
chr4	14392185	14392807	999	At4g29190	zinc finger (CCCH-type) family protein
chr4	14392842	14393368	999	At4g29190	zinc finger (CCCH-type) family protein
chr4	14738884	14739072	983	At4g30140	GDSL-motif lipase/hydrolase family protein
chr4	14739251	14739460	935	At4g30140	GDSL-motif lipase/hydrolase family protein
chr4	14954323	14954464	869	At4g30650	hydrophobic protein, putative / low temperature and salt responsive protein, putative
chr4	14954575	14954916	999	At4g30650	hydrophobic protein, putative / low temperature and salt responsive protein, putative
chr4	14955790	14956104	999	At4g30660	hydrophobic protein, putative / low temperature and salt responsive protein, putative
chr4	14961605	14961908	999	At4g30690	translation initiation factor 3 (IF-3) family protein
chr4	15613814	15614219	999	At4g32340	binding
chr4	15659425	15659917	999	At4g32440	agenet domain-containing protein
chr4	15803125	15804003	999	At4g32760	protein transporter
chr4	15852935	15853867	991	At4g32850	PAP(IV)_nPAP__nPAP (NUCLEAR POLY(A) POLYMERASE); nucleotidyltransferase
chr4	15854077	15854632	997	At4g32850	PAP(IV)_nPAP__nPAP (NUCLEAR POLY(A) POLYMERASE); nucleotidyltransferase
chr4	16577809	16578298	999	At4g34750	auxin-responsive protein, putative / small auxin up RNA (SAUR_E)
chr4	16945068	16945506	999	At4g35770	SEN1_DIN1__SEN1 (DARK INDUCIBLE 1)
chr4	16945583	16946099	999	At4g35770	SEN1_DIN1__SEN1 (DARK INDUCIBLE 1)
chr4	17287807	17288335	999	At4g36670	mannitol transporter, putative
chr4	17337813	17338216	999	At4g36790	transporter-related
chr4	17353483	17353797	885	At4g36850	PQ-loop repeat family protein / transmembrane family protein
chr4	17353999	17354257	990	At4g36850	PQ-loop repeat family protein / transmembrane family protein
chr4	17354403	17354547	944	At4g36850	PQ-loop repeat family protein / transmembrane family protein
chr4	17811164	17811512	972	At4g37880	protein binding / zinc ion binding
chr4	17999377	17999594	946	At4g38470	protein kinase family protein
chr4	18001594	18001704	939	At4g38470	protein kinase family protein
chr4	18002058	18002346	999	At4g38470	protein kinase family protein
chr4	18003110	18003654	999	At4g38470	protein kinase family protein
chr4	18027899	18028298	989	At4g38550	similar to unknown protein [Arabidopsis thaliana] (TAIR:AT2G20950.3); similar to pEARLI 4 gene product (GB:AAC37472.1); contains InterPro domain Arabidopsis phospholipase-like; (InterPro:IPR007942)
chr4	18028436	18028753	863	At4g38550	similar to unknown protein [Arabidopsis thaliana] (TAIR:AT2G20950.3); similar to pEARLI 4 gene product (GB:AAC37472.1); contains InterPro domain Arabidopsis phospholipase-like; (InterPro:IPR007942)
chr4	18035314	18035699	999	At4g38580	ATFP6__ATFP6 (FARNESYLATED PROTEIN 6); metal ion binding
chr4	18215569	18216349	999	At4g39090	RD19_EMB3005_RD19A__RD19 (RESPONSIVE TO DEHYDRATION 19); cysteine-type peptidase
chr4	18216875	18217403	999	At4g39090	RD19_EMB3005_RD19A__RD19 (RESPONSIVE TO DEHYDRATION 19); cysteine-type peptidase
chr4	18274440	18274824	999	At4g39260	GR-RBP8_CCR1_ATGRP8__ATGRP8/GR-RBP8 (COLD, CIRCADIAN RHYTHM, AND RNA BINDING 1, GLYCINE-RICH PROTEIN 8); RNA binding
chr5	208252	208457	805	At5g01520	zinc finger (C3HC4-type RING finger) family protein
chr5	289996	290281	996	At5g01750	Identical to Protein At5g01750 [Arabidopsis Thaliana] (GB:Q9LZX1;GB:Q8LEK9); similar to unknown protein [Arabidopsis thaliana] (TAIR:AT3G11740.1); similar to Protein of unknown function DUF567 [Medicago truncatula] (GB:ABE88873.1); contains InterPro domain Protein of unknown function DUF567; (InterPro:IPR007612)
chr5	290447	290654	986	At5g01750	Identical to Protein At5g01750 [Arabidopsis Thaliana] (GB:Q9LZX1;GB:Q8LEK9); similar to unknown protein [Arabidopsis thaliana] (TAIR:AT3G11740.1); similar to Protein of unknown function DUF567 [Medicago truncatula] (GB:ABE88873.1); contains InterPro domain Protein of unknown function DUF567; (InterPro:IPR007612)
chr5	290957	291278	999	At5g01750	Identical to Protein At5g01750 [Arabidopsis Thaliana] (GB:Q9LZX1;GB:Q8LEK9); similar to unknown protein [Arabidopsis thaliana] (TAIR:AT3G11740.1); similar to Protein of unknown function DUF567 [Medicago truncatula] (GB:ABE88873.1); contains InterPro domain Protein of unknown function DUF567; (InterPro:IPR007612)
chr5	426387	427234	999	At5g02160	similar to hypothetical protein [Solanum lycopersicum] (GB:BAD95796.1)
chr5	971400	971556	997	At5g03710	unknown protein
chr5	1092113	1092722	999	At5g04040	SDP1__SDP1 (SUGAR-DEPENDENT1); triacylglycerol lipase
chr5	1145620	1146206	970	At5g04170	calcium-binding EF hand family protein
chr5	1152029	1152413	989	At5g04190	PKS4__PKS4 (PHYTOCHROME KINASE SUBSTRATE 4)
chr5	1438517	1438779	958	At5g04910	similar to REX1-B [Chlamydomonas reinhardtii] (GB:AAP12521.1); similar to Os01g0265700 [Oryza sativa (japonica cultivar-group)] (GB:NP_001042671.1)
chr5	1503927	1504243	985	At5g05090	myb family transcription factor
chr5	1727956	1728246	844	At5g05750	DNAJ heat shock N-terminal domain-containing protein
chr5	1728572	1728866	962	At5g05750	DNAJ heat shock N-terminal domain-containing protein
chr5	1790268	1790767	999	At5g05960	protease inhibitor/seed storage/lipid transfer protein (LTP) family protein
chr5	2061544	2061696	801	At5g06690	(THIOREDOXIN-LIKE 5); thiol-disulfide exchange intermediate
chr5	2132425	2132934	981	At5g06860	PGIP1__PGIP1 (POLYGALACTURONASE INHIBITING PROTEIN 1); protein binding
chr5	2133076	2133408	975	At5g06860	PGIP1__PGIP1 (POLYGALACTURONASE INHIBITING PROTEIN 1); protein binding
chr5	2134170	2135064	999	At5g06870	PGIP2__PGIP2 (POLYGALACTURONASE INHIBITING PROTEIN 2); protein binding
chr5	2356614	2356902	999	At5g07440	GDH2__GDH2 (GLUTAMATE DEHYDROGENASE 2); oxidoreductase
chr5	2357240	2357420	998	At5g07440	GDH2__GDH2 (GLUTAMATE DEHYDROGENASE 2); oxidoreductase
chr5	2357606	2358039	999	At5g07440	GDH2__GDH2 (GLUTAMATE DEHYDROGENASE 2); oxidoreductase
chr5	2386416	2386464	999	At5g07540	GRP16_ATGRP-6__GRP16 (Glycine rich protein 16); nutrient reservoir
chr5	2399724	2400350	999	At5g07580	DNA binding / transcription factor
chr5	2430992	2431348	836	At5g07670	F-box family protein
chr5	2755573	2755968	997	At5g08520	myb family transcription factor
chr5	2817527	2817996	946	At5g08660	unknown protein
chr5	3187359	3187592	879	At5g10170	inositol-3-phosphate synthase, putative / myo-inositol-1-phosphate synthase, putative / MI-1-P synthase, putative
chr5	3194669	3195122	980	At5g10180	AST68_SULTR2;1__AST68 (Sulfate transporter 2.1)
chr5	3196660	3196961	999	At5g10180	AST68_SULTR2;1__AST68 (Sulfate transporter 2.1)
chr5	3200732	3201157	950	At5g10190	transporter-related
chr5	3268174	3268727	996	At5g10380	zinc finger (C3HC4-type RING finger) family protein
chr5	3396827	3397118	975	At5g10745	unknown protein
chr5	3400494	3400595	871	At5g10760	aspartyl protease family protein
chr5	3400675	3400968	997	At5g10760	aspartyl protease family protein
chr5	3401039	3401251	938	At5g10760	aspartyl protease family protein
chr5	3401580	3401827	803	At5g10760	aspartyl protease family protein
chr5	3597904	3598232	863	At5g11280	similar to unknown protein [Arabidopsis thaliana] (TAIR:AT1G80200.1); similar to Ankyrin [Medicago truncatula] (GB:ABE78998.1)
chr5	3720181	3721233	998	At5g11580	UVB-resistance protein-related / regulator of chromosome condensation (RCC1) family protein
chr5	3757739	3758208	994	At5g11670	ATNADP-ME2__ATNADP-ME2 (NADP-MALIC ENZYME 2); malate dehydrogenase (oxaloacetate-decarboxylating) (NADP+)/ malic enzyme/ oxidoreductase, acting on NADH or NADPH, NAD or NADP as acceptor
chr5	4087721	4089006	999	At5g12940	leucine-rich repeat family protein
chr5	4096197	4096337	960	At5g12950	similar to unknown protein [Arabidopsis thaliana] (TAIR:AT5G12960.1); similar to Os06g0612900 [Oryza sativa (japonica cultivar-group)] (GB:NP_001058067.1); similar to Os02g0195500 [Oryza sativa (japonica cultivar-group)] (GB:NP_001046185.1); similar to hypothetical protein [Oryza sativa (japonica cultivar-group)] (GB:BAD35522.1); contains InterPro domain Six-hairpin glycosidase; (InterPro:IPR0089…
chr5	4096407	4096784	999	At5g12950	similar to unknown protein [Arabidopsis thaliana] (TAIR:AT5G12960.1); similar to Os06g0612900 [Oryza sativa (japonica cultivar-group)] (GB:NP_001058067.1); similar to Os02g0195500 [Oryza sativa (japonica cultivar-group)] (GB:NP_001046185.1); similar to hypothetical protein [Oryza sativa (japonica cultivar-group)] (GB:BAD35522.1); contains InterPro domain Six-hairpin glycosidase; (InterPro:IPR0089…
chr5	4369769	4370207	982	At5g13570	DCP2_TDT__DCP2 (DECAPPING 2); hydrolase
chr5	4556993	4557525	991	At5g14120	nodulin family protein
chr5	4558246	4558640	988	At5g14120	nodulin family protein
chr5	4637472	4637761	926	At5g14390	similar to unknown protein [Arabidopsis thaliana] (TAIR:AT3G01690.1); similar to Esterase/lipase/thioesterase [Medicago truncatula] (GB:ABD32255.1); contains InterPro domain Esterase/lipase/thioesterase; (InterPro:IPR000379); contains InterPro domain Alpha/beta hydrolase fold-1; (InterPro:IPR000073)
chr5	4654333	4654618	991	At5g14430	dehydration-responsive protein-related
chr5	4655342	4655916	999	At5g14430	dehydration-responsive protein-related
chr5	5238712	5239301	999	At5g16030	similar to unknown protein [Arabidopsis thaliana] (TAIR:AT3G02500.1); similar to hypothetical protein [Cleome spinosa] (GB:ABD96956.1)
chr5	5240463	5240737	948	At5g16030	similar to unknown protein [Arabidopsis thaliana] (TAIR:AT3G02500.1); similar to hypothetical protein [Cleome spinosa] (GB:ABD96956.1)
chr5	5266753	5267065	862	At5g16120	hydrolase, alpha/beta fold family protein
chr5	5267531	5267930	984	At5g16120	hydrolase, alpha/beta fold family protein
chr5	5551148	5551405	987	At5g16880	VHS domain-containing protein / GAT domain-containing protein
chr5	5714776	5715026	899	At5g17330	GAD__GAD (Glutamate decarboxylase 1); calmodulin binding
chr5	5993296	5993744	828	At5g18120	ATAPRL7__ATAPRL7 (APR-LIKE 7)
chr5	5995509	5995692	840	At5g18130	similar to unknown protein [Arabidopsis thaliana] (TAIR:AT3G03870.2); similar to hypothetical protein MtrDRAFT_AC156827g15v1 [Medicago truncatula] (GB:ABE86405.1)
chr5	5995761	5996366	999	At5g18130	similar to unknown protein [Arabidopsis thaliana] (TAIR:AT3G03870.2); similar to hypothetical protein MtrDRAFT_AC156827g15v1 [Medicago truncatula] (GB:ABE86405.1)
chr5	5999241	5999790	998	At5g18140	DNAJ heat shock N-terminal domain-containing protein
chr5	6006068	6006248	955	At5g18170	GDH1__GDH1 (GLUTAMATE DEHYDROGENASE 1); oxidoreductase
chr5	6006534	6006606	872	At5g18170	GDH1__GDH1 (GLUTAMATE DEHYDROGENASE 1); oxidoreductase
chr5	6006744	6006918	937	At5g18170	GDH1__GDH1 (GLUTAMATE DEHYDROGENASE 1); oxidoreductase
chr5	6007420	6007639	999	At5g18170	GDH1__GDH1 (GLUTAMATE DEHYDROGENASE 1); oxidoreductase
chr5	6007747	6007952	952	At5g18170	GDH1__GDH1 (GLUTAMATE DEHYDROGENASE 1); oxidoreductase
chr5	6008279	6008430	969	At5g18170	GDH1__GDH1 (GLUTAMATE DEHYDROGENASE 1); oxidoreductase
chr5	6183281	6183782	999	At5g18600	glutaredoxin family protein
chr5	6205193	6205582	950	At5g18630	lipase class 3 family protein
chr5	6265937	6266146	861	At5g18780	F-box family protein
chr5	6415056	6415813	999	At5g19120	pepsin A
chr5	6424970	6425381	999	At5g19140	auxin/aluminum-responsive protein, putative
chr5	6425907	6426163	987	At5g19140	auxin/aluminum-responsive protein, putative
chr5	6740474	6740830	944	At5g19940	plastid-lipid associated protein PAP-related / fibrillin-related
chr5	6834390	6834578	954	At5g20250	DIN10__DIN10 (DARK INDUCIBLE 10); hydrolase, hydrolyzing O-glycosyl compounds
chr5	6834648	6835923	999	At5g20250	DIN10__DIN10 (DARK INDUCIBLE 10); hydrolase, hydrolyzing O-glycosyl compounds
chr5	6836032	6836860	999	At5g20250	DIN10__DIN10 (DARK INDUCIBLE 10); hydrolase, hydrolyzing O-glycosyl compounds
chr5	7139174	7139613	999	At5g21020	unknown protein
chr5	7207396	7207578	914	At5g21170	AMP-activated protein kinase
chr5	7207691	7207795	957	At5g21170	AMP-activated protein kinase
chr5	7207943	7208449	999	At5g21170	AMP-activated protein kinase
chr5	7303088	7303422	916	At5g22050	protein kinase family protein
chr5	7372520	7372768	970	At5g22270	similar to unknown protein [Arabidopsis thaliana] (TAIR:AT3G11600.1); similar to H0913C04.5 [Oryza sativa (indica cultivar-group)] (GB:CAJ86164.1); similar to Os04g0415000 [Oryza sativa (japonica cultivar-group)] (GB:NP_001052757.1); similar to Os02g0536500 [Oryza sativa (japonica cultivar-group)] (GB:NP_001047044.1)
chr5	7666844	7667144	999	At5g22920	zinc finger (C3HC4-type RING finger) family protein
chr5	8083391	8083421	905	At5g23950	C2 domain-containing protein
chr5	8356034	8356254	888	At5g24470	APRR5_PRR5__APRR5 (PSEUDO-RESPONSE REGULATOR 5); transcription regulator
chr5	8356519	8356784	999	At5g24470	APRR5_PRR5__APRR5 (PSEUDO-RESPONSE REGULATOR 5); transcription regulator
chr5	8365653	8365876	999	At5g24490	30S ribosomal protein, putative
chr5	8366232	8366344	859	At5g24490	30S ribosomal protein, putative
chr5	8366486	8366664	977	At5g24490	30S ribosomal protein, putative
chr5	8367111	8367339	951	At5g24490	30S ribosomal protein, putative
chr5	8378976	8379123	862	At5g24530	oxidoreductase, 2OG-Fe(II) oxygenase family protein
chr5	8381462	8381644	911	At5g24530	oxidoreductase, 2OG-Fe(II) oxygenase family protein
chr5	8382033	8382223	834	At5g24530	oxidoreductase, 2OG-Fe(II) oxygenase family protein
chr5	8382918	8383385	999	At5g24530	oxidoreductase, 2OG-Fe(II) oxygenase family protein
chr5	8516350	8516615	853	At5g24800	ATBZIP9_BZO2H2__BZO2H2 (basic leucine zipper O2 homolog 2); DNA binding / transcription factor
chr5	8725331	8725542	854	At5g25210	similar to unknown protein [Arabidopsis thaliana] (TAIR:AT4G32030.1)
chr5	8794337	8794872	998	At5g25350	EBF2__EBF2 (EIN3-BINDING F BOX PROTEIN 2)
chr5	9381731	9381844	999	At5g26590	copia-like retrotransposon family
chr5	9386487	9386601	999	At5g26590	copia-like retrotransposon family
chr5	9617947	9618449	999	At5g27280	zinc finger (DNL type) family protein
chr5	9630451	9631023	887	At5g27320	ATGID1C_GID1C__ATGID1C/GID1C (GA INSENSITIVE DWARF1C)
chr5	9684508	9685321	999	At5g27420	zinc finger (C3HC4-type RING finger) family protein
chr5	9819893	9820130	962	At5g27730=p200	intergenic transcript
chr5	9819502	9819711	961	At5g27730=p800	intergenic transcript
chr5	9941998	9942283	967	At5g27920	F-box family protein
chr5	10221190	10221684	999	At5g28250	Ulp1 protease family protein
chr5	10400760	10400821	997	At5g28466	copia-like retrotransposon family
chr5	10405740	10405852	999	At5g28466	copia-like retrotransposon family
chr5	11678813	11678835	988	At5g31685=utr3=int=At5g31702=utr3	intergenic transcript associated with smRNAs and repeats
chr5	11685462	11685480	939	At5g31702=p800	intergenic transcript associated with smRNAs and repeats
chr5	11719302	11719322	970	At5g31770=utr3=int=At5g31787=p800	intergenic transcript associated with smRNAs and repeats
chr5	11719468	11719533	999	At5g31770=utr3=int=At5g31787=p800	intergenic transcript associated with smRNAs and repeats
chr5	11720039	11720108	987	At5g31770=utr3=int=At5g31787=p800	intergenic transcript associated with smRNAs and repeats
chr5	11720327	11720407	999	At5g31770=utr3=int=At5g31787=p800	intergenic transcript associated with smRNAs and repeats
chr5	11720695	11720711	986	At5g31770=utr3=int=At5g31787=p800	intergenic transcript associated with smRNAs and repeats
chr5	11720934	11721008	999	At5g31770=utr3=int=At5g31787=p800	intergenic transcript associated with smRNAs and repeats
chr5	11721046	11721061	998	At5g31770=utr3=int=At5g31787=p800	intergenic transcript associated with smRNAs and repeats
chr5	11721207	11721239	930	At5g31770=utr3=int=At5g31787=p800	intergenic transcript associated with smRNAs and repeats
chr5	11721383	11721446	980	At5g31770=utr3=int=At5g31787=p800	intergenic transcript associated with smRNAs and repeats
chr5	11721927	11721959	999	At5g31770=utr3=int=At5g31787=p800	intergenic transcript associated with smRNAs and repeats
chr5	11722373	11722394	892	At5g31770=utr3=int=At5g31787=p800	intergenic transcript associated with smRNAs and repeats
chr5	11722458	11722469	957	At5g31770=utr3=int=At5g31787=p800	intergenic transcript associated with smRNAs and repeats
chr5	11722986	11723002	929	At5g31770=utr3=int=At5g31787=p800	intergenic transcript associated with smRNAs and repeats
chr5	11723697	11723713	931	At5g31770=utr3=int=At5g31787=p800	intergenic transcript associated with smRNAs and repeats
chr5	11724230	11724270	999	At5g31770=utr3=int=At5g31787=p800	intergenic transcript associated with smRNAs and repeats
chr5	11724398	11724454	881	At5g31770=utr3=int=At5g31787=p800	intergenic transcript associated with smRNAs and repeats
chr5	11724939	11724969	999	At5g31770=utr3=int=At5g31787=p800	intergenic transcript associated with smRNAs and repeats
chr5	11725385	11725406	892	At5g31770=utr3=int=At5g31787=p800	intergenic transcript associated with smRNAs and repeats
chr5	11725465	11725481	986	At5g31770=utr3=int=At5g31787=p800	intergenic transcript associated with smRNAs and repeats
chr5	11725638	11725672	999	At5g31770=utr3=int=At5g31787=p800	intergenic transcript associated with smRNAs and repeats
chr5	11726166	11726182	929	At5g31770=utr3=int=At5g31787=p800	intergenic transcript associated with smRNAs and repeats
chr5	11726699	11726715	986	At5g31770=utr3=int=At5g31787=p800	intergenic transcript associated with smRNAs and repeats
chr5	11728182	11728278	999	At5g31770=utr3=int=At5g31787=p800	intergenic transcript associated with smRNAs and repeats
chr5	11728973	11728989	929	At5g31770=utr3=int=At5g31787=p800	intergenic transcript associated with smRNAs and repeats
chr5	11740464	11740479	998	At5g31804=p800=int=At5g31821=p800	intergenic transcript associated with smRNAs and repeats
chr5	11741348	11741364	931	At5g31804=p800=int=At5g31821=p800	intergenic transcript associated with smRNAs and repeats
chr5	11741719	11741723	832	At5g31804=p800=int=At5g31821=p800	intergenic transcript associated with smRNAs and repeats
chr5	11741886	11741900	999	At5g31804=p800=int=At5g31821=p800	intergenic transcript associated with smRNAs and repeats
chr5	11743581	11743640	880	At5g31804=p800=int=At5g31821=p800	intergenic transcript associated with smRNAs and repeats
chr5	11745539	11745597	917	At5g31804=p800=int=At5g31821=p800	intergenic transcript associated with smRNAs and repeats
chr5	11746946	11746976	838	At5g31804=p800=int=At5g31821=p800	intergenic transcript associated with smRNAs and repeats
chr5	11748006	11748029	874	At5g31804=p800=int=At5g31821=p800	intergenic transcript associated with smRNAs and repeats
chr5	11748367	11748393	998	At5g31804=p800=int=At5g31821=p800	intergenic transcript associated with smRNAs and repeats
chr5	11749434	11749454	953	At5g31804=p800=int=At5g31821=p800	intergenic transcript associated with smRNAs and repeats
chr5	11749788	11749816	999	At5g31804=p800=int=At5g31821=p800	intergenic transcript associated with smRNAs and repeats
chr5	11749965	11750002	834	At5g31804=p800=int=At5g31821=p800	intergenic associated with repeats and smRNAs
chr5	11750838	11750859	999	At5g31804=p800=int=At5g31821=p800	intergenic transcript associated with smRNAs and repeats
chr5	11751001	11751038	884	At5g31804=p800=int=At5g31821=p800	intergenic transcript associated with smRNAs and repeats
chr5	11751903	11751957	992	At5g31804=p800=int=At5g31821=p800	intergenic transcript associated with smRNAs and repeats
chr5	11752053	11752102	999	At5g31804=p800=int=At5g31821=p800	intergenic transcript associated with smRNAs and repeats
chr5	11753149	11753170	999	At5g31804=p800=int=At5g31821=p800	intergenic transcript associated with smRNAs and repeats
chr5	11753328	11753342	817	At5g31804=p800=int=At5g31821=p800	intergenic transcript associated with smRNAs and repeats
chr5	12578916	12579162	987	At5g33290	XGD1__XGD1 (XYLOGALACTURONAN DEFICIENT 1); catalytic
chr5	12586367	12586449	999	At5g33303=p800	intergenic transcript
chr5	12600777	12600859	999	At5g33315	copia-like retrotransposon family
chr5	13967929	13968139	972	At5g35777	copia-like retrotransposon family
chr5	14668990	14669376	905	At5g37070	similar to unknown protein [Arabidopsis thaliana] (TAIR:AT3G08890.2); similar to Protein of unknown function, DUF538 [Medicago truncatula] (GB:ABE91533.1); contains InterPro domain Protein of unknown function DUF538; (InterPro:IPR007493)
chr5	14861327	14861503	999	At5g37430	unknown protein
chr5	15602859	15603142	999	At5g38930	germin-like protein, putative
chr5	15606290	15606869	999	At5g38940	manganese ion binding / metal ion binding / nutrient reservoir
chr5	15635760	15636195	990	At5g39020	protein kinase family protein
chr5	16082774	16083267	983	At5g40170	disease resistance family protein
chr5	16316482	16316729	942	At5g40720	unknown protein
chr5	16523968	16524633	999	At5g41260	protein kinase family protein
chr5	16600604	16601005	923	At5g41410	BEL1__BEL1 (BELL 1); DNA binding / transcription factor
chr5	16987095	16987341	921	At5g42420	transporter-related
chr5	16997838	16998306	946	At5g42460	F-box family protein
chr5	17189485	17189932	999	At5g42825	unknown protein
chr5	17633667	17633965	862	At5g43810	ZLL_PNH__ZLL (ZWILLE)
chr5	17847033	17848215	999	At5g44260	zinc finger (CCCH-type) family protein
chr5	17986554	17986779	928	At5g44572	unknown protein
chr5	18328896	18328977	906	At5g45230=p800=int=At5g45240=p800	intergenic transcript
chr5	18338993	18339285	863	At5g45250	RPS4__RPS4 (RESISTANT TO P. SYRINGAE 4)
chr5	18577697	18577914	803	At5g45750	AtRABA1c__AtRABA1c (Arabidopsis Rab GTPase homolog A1c); GTP binding
chr5	18811401	18811691	900	At5g46330	FLS2__FLS2 (FLAGELLIN-SENSITIVE 2); ATP binding / kinase/ protein binding / protein serine/threonine kinase/ transmembrane receptor protein serine/threonine kinase
chr5	18811802	18812094	943	At5g46330	FLS2__FLS2 (FLAGELLIN-SENSITIVE 2); ATP binding / kinase/ protein binding / protein serine/threonine kinase/ transmembrane receptor protein serine/threonine kinase
chr5	18812420	18812710	974	At5g46330	FLS2__FLS2 (FLAGELLIN-SENSITIVE 2); ATP binding / kinase/ protein binding / protein serine/threonine kinase/ transmembrane receptor protein serine/threonine kinase
chr5	19200977	19201163	971	At5g47240	ATNUDT8__ATNUDT8 (Arabidopsis thaliana Nudix hydrolase homolog 8); hydrolase
chr5	19202534	19202810	967	At5g47240	ATNUDT8__ATNUDT8 (Arabidopsis thaliana Nudix hydrolase homolog 8); hydrolase
chr5	19364519	19364837	972	At5g47770	FPS1__FPS1 (FARNESYL DIPHOSPHATE SYNTHASE 1); dimethylallyltranstransferase/ geranyltranstransferase
chr5	19737837	19737998	881	At5g48620	disease resistance protein (CC-NBS-LRR class), putative
chr5	19738091	19738342	999	At5g48620	disease resistance protein (CC-NBS-LRR class), putative
chr5	20030117	20030544	805	At5g49360	BXL1__BXL1 (BETA-XYLOSIDASE 1); hydrolase, hydrolyzing O-glycosyl compounds
chr5	20237889	20238070	879	At5g49760	leucine-rich repeat family protein / protein kinase family protein
chr5	20336751	20336900	813	At5g49945	Identical to Hypothetical protein At5g49945 precursor [Arabidopsis Thaliana] (GB:Q94CC0;GB:Q9LTX6); similar to unknown protein [Arabidopsis thaliana] (TAIR:AT4G24330.1); similar to ENSANGP00000011982 [Anopheles gambiae str. PEST] (GB:XP_319151.3); similar to Os05g0432400 [Oryza sativa (japonica cultivar-group)] (GB:NP_001055631.1); contains InterPro domain Protein of unknown function DUF1682; (In…
chr5	20560819	20561278	989	At5g50450	zinc finger (MYND type) family protein
chr5	20817092	20817309	992	At5g51180	similar to unknown protein [Arabidopsis thaliana] (TAIR:AT4G25770.1); similar to Os03g0726800 [Oryza sativa (japonica cultivar-group)] (GB:NP_001051137.1); similar to putative protein [Oryza sativa] (GB:CAC39063.1); similar to Os08g0143700 [Oryza sativa (japonica cultivar-group)] (GB:NP_001060979.1); contains InterPro domain Esterase/lipase/thioesterase; (InterPro:IPR000379); contains InterPro do…
chr5	20953718	20954068	938	At5g51545	LPA2__similar to Os02g0125000 [Oryza sativa (japonica cultivar-group)] (GB:NP_001045742.1); contains domain Subunit VIII of photosystem I reaction centre, PsaI (SSF81540)
chr5	21652412	21652628	994	At5g53310	myosin heavy chain-related
chr5	21773395	21773620	890	At5g53550	YSL3__YSL3 (YELLOW STRIPE LIKE 3); oligopeptide transporter
chr5	21775110	21775959	999	At5g53550	YSL3__YSL3 (YELLOW STRIPE LIKE 3); oligopeptide transporter
chr5	21963934	21964322	999	At5g54080	HGO__HGO (HOMOGENTISATE 1,2-DIOXYGENASE); homogentisate 1,2-dioxygenase
chr5	21965097	21965429	999	At5g54080	HGO__HGO (HOMOGENTISATE 1,2-DIOXYGENASE); homogentisate 1,2-dioxygenase
chr5	22009080	22009592	999	At5g54190	PORA__PORA (Protochlorophyllide reductase A); oxidoreductase/ protochlorophyllide reductase
chr5	22174822	22175254	980	At5g54540	similar to unknown protein [Arabidopsis thaliana] (TAIR:AT4G25170.1); similar to expressed protein [Oryza sativa (japonica cultivar-group)] (GB:ABF94497.1); similar to Os08g0179900 [Oryza sativa (japonica cultivar-group)] (GB:NP_001061135.1)
chr5	22569061	22569288	905	At5g55700	BMY6__BMY6 (beta-amylase 6); beta-amylase
chr5	22569760	22569906	936	At5g55700	BMY6__BMY6 (beta-amylase 6); beta-amylase
chr5	22571000	22571184	856	At5g55700	BMY6__BMY6 (beta-amylase 6); beta-amylase
chr5	22571794	22572005	981	At5g55700	BMY6__BMY6 (beta-amylase 6); beta-amylase
chr5	22702406	22702659	887	At5g56020	similar to unknown protein [Arabidopsis thaliana] (TAIR:AT4G26550.1); similar to Os06g0300300 [Oryza sativa (japonica cultivar-group)] (GB:NP_001057449.1); similar to hypothetical protein cgd6_630 [Cryptosporidium parvum Iowa II] (GB:XP_627442.1); similar to Os06g0608600 [Oryza sativa (japonica cultivar-group)] (GB:NP_001058041.1); contains InterPro domain SFT2-like; (InterPro:IPR011691)
chr5	22933224	22933337	999	At5g56605	copia-like retrotransposon family
chr5	23025069	23025353	949	At5g56870	BGAL4__beta-galactosidase, putative / lactase, putative
chr5	23025434	23025854	999	At5g56870	BGAL4__beta-galactosidase, putative / lactase, putative
chr5	23206813	23206972	873	At5g57220	CYP81F2__CYP81F2 (cytochrome P450, family 81, subfamily F, polypeptide 2); oxygen binding
chr5	23358240	23358522	868	At5g57630	SnRK3.4_CIPK21__CIPK21 (CBL-INTERACTING PROTEIN KINASE 21); kinase
chr5	23365621	23366015	994	At5g57655	xylose isomerase family protein
chr5	23372790	23373701	976	At5g57660	zinc finger (B-box type) family protein
chr5	23464257	23464403	818	At5g57887	unknown protein
chr5	23761494	23761711	961	At5g58787	protein binding / zinc ion binding
chr5	23981656	23981905	981	At5g59420	oxysterol-binding family protein
chr5	24040059	24040176	999	At5g59630	pseudogene, glycine-rich protein,
chr5	24064181	24064432	975	At5g59680	leucine-rich repeat protein kinase, putative
chr5	24067375	24068109	999	At5g59680	leucine-rich repeat protein kinase, putative
chr5	24068774	24069298	997	At5g59690	histone H4
chr5	24159359	24159714	918	At5g59960	similar to Os01g0151600 [Oryza sativa (japonica cultivar-group)] (GB:NP_001042041.1); similar to similar to Dictyostelium discoideum (Slime mold). MkpA protein (GB:AAL92603.1)
chr5	24544505	24544904	999	At5g60950	phytochelatin synthetase-related
chr5	24641369	24641693	938	At5g61210	SNAP33_SNP33__SNAP33 (synaptosomal-associated protein 33); t-SNARE
chr5	24645804	24646143	901	At5g61230	ankyrin repeat family protein
chr5	24694880	24695254	999	At5g61380	TOC1_APRR1_PRR1__TOC1 (TIMING OF CAB1 1); transcription regulator
chr5	24761683	24761898	864	At5g61530	small G protein family protein / RhoGAP family protein
chr5	24781901	24782476	999	At5g61590	AP2 domain-containing transcription factor family protein
chr5	25034684	25035325	999	At5g62280	similar to unknown protein [Arabidopsis thaliana] (TAIR:AT2G45360.1); similar to Os02g0455400 [Oryza sativa (japonica cultivar-group)] (GB:NP_001046773.1); similar to unknown protein [Oryza sativa (japonica cultivar-group)] (GB:BAD19988.1); contains InterPro domain Protein of unknown function DUF1442; (InterPro:IPR009902)
chr5	25054776	25055310	999	At5g62350	invertase/pectin methylesterase inhibitor family protein / DC 1.2 homolog (FL5-2I22)
chr5	25057943	25058453	999	At5g62360	invertase/pectin methylesterase inhibitor family protein
chr5	25364026	25364469	994	At5g63190	MA3 domain-containing protein
chr5	25364578	25365500	999	At5g63190	MA3 domain-containing protein
chr5	25365562	25365957	999	At5g63190	MA3 domain-containing protein
chr5	25557987	25558335	938	At5g63810	gene BGAL10 function member of Glycoside Hydrolase Family 35 product BGAL10 (beta-galactosidase 10)
chr5	25713657	25713836	851	At5g64240	ATMC3__latex-abundant family protein (AMC3) / caspase family protein
chr5	25714431	25714618	941	At5g64240	ATMC3__latex-abundant family protein (AMC3) / caspase family protein
chr5	25721174	25722177	999	At5g64260	phosphate-responsive protein, putative
chr5	26019381	26019633	979	At5g65080	AGL68_MAF5__MAF5 (MADS AFFECTING FLOWERING 5)
chr5	26119686	26120111	945	At5g65310	ATHB5_ATHB-5__ATHB5 (ARABIDOPSIS THALIANA HOMEOBOX PROTEIN 5)
chr5	26404217	26404517	979	At5g65960	similar to hypothetical protein DDBDRAFT_0189734 [Dictyostelium discoideum AX4] (GB:XP_647509.1); similar to Os04g0584800 [Oryza sativa (japonica cultivar-group)] (GB:NP_001053672.1); contains domain RAS-RELATED GTPASE (PTHR11708); contains domain no description (G3D.3.40.50.300); contains domain P-loop containing nucleoside triphosphate hydrolases (SSF52540)
chr5	26486396	26486791	861	At5g66250	kinectin-related
chr5	26586947	26587464	832	At5g66570	PSBO-1_OE33_OEE1_OEE33_PSBO1__PSBO-1 (OXYGEN-EVOLVING ENHANCER 33)
chr5	26684264	26684579	999	At5g66790	protein kinase family protein
chr5	26727882	26728062	897	At5g66880	SNRK2-3_SNRK2.3_SRK2I__SNRK2-3/SNRK2.3/SRK2I (SNF1-RELATED PROTEIN KINASE 2-3, SNF1-RELATED PROTEIN KINASE 2.3); kinase/ protein kinase
chr5	26729328	26729600	967	At5g66880	SNRK2-3_SNRK2.3_SRK2I__SNRK2-3/SNRK2.3/SRK2I (SNF1-RELATED PROTEIN KINASE 2-3, SNF1-RELATED PROTEIN KINASE 2.3); kinase/ protein kinase
chr5	26729701	26730118	999	At5g66880	SNRK2-3_SNRK2.3_SRK2I__SNRK2-3/SNRK2.3/SRK2I (SNF1-RELATED PROTEIN KINASE 2-3, SNF1-RELATED PROTEIN KINASE 2.3); kinase/ protein kinase
