# Supplementary material for: Two Plant Viral Suppressors of Silencing Require the Ethylene-Inducible Host Transcription Factor RAV2 to Block RNA Silencing
Source: PLoS Pathog. 2010 Jan 15;6(1):e1000729. doi: 10.1371/journal.ppat.1000729 (PMC2800190; doi:10.1371/journal.ppat.1000729)
Supplement: Table S10 — Tiling array results: Arabidopsis genomic regions up-regulated in HC-Pro compared to rav2/HC-Pro and WT plants (0.05 MB XLS) [file ppat.1000729.s013.xls]

## Sheet: Sheet1
Table S10.	Tiling array results: Arabidopsis genomic regions up-regulated in HC-Pro compared to rav2/HC-Pro and WT plants
Gene	Annotation
At1g01060	LHY__LHY (LATE ELONGATED HYPOCOTYL)
At1g01120	KCS1__KCS1 (3-KETOACYL-COA SYNTHASE 1); acyltransferase
At1g02820	late embryogenesis abundant 3 family protein / LEA3 family protein
At1g05680	UDP-glucoronosyl/UDP-glucosyl transferase family protein
At1g06000	UDP-glucoronosyl/UDP-glucosyl transferase family protein
At1g10370	ATGSTU17_ERD9_GST30__ATGSTU17/ERD9/GST30/GST30B (EARLY-RESPONSIVE TO DEHYDRATION 9, GLUTATHIONE S-TRANSFERASE 30, GLUTATHIONE S-TRANSFERASE 30B); glutathione transferase
At1g10585	transcription factor
At1g13650	similar to 18S pre-ribosomal assembly protein gar2-related [Arabidopsis thaliana] (TAIR:AT2G03810.3); similar to hypothetical protein [Trypanosoma cruzi strain CL Brener] (GB:XP_813437.1)
At1g15290	binding
At1g19920	APS2_ASA1__APS2 (ATP SULFURYLASE PRECURSOR)
At1g23205	invertase/pectin methylesterase inhibitor family protein
At1g28600	carboxylic ester hydrolase
At1g29880	glycyl-tRNA synthetase / glycine--tRNA ligase
At1g32900	starch synthase, putative
At1g51680	4CL1_4CL.1_AT4CL1__4CL1 (4-COUMARATE:COA LIGASE 1)
At1g55960	similar to unknown protein [Arabidopsis thaliana] (TAIR:AT3G13062.1); similar to Lipid-binding START [Medicago truncatula] (GB:ABE91086.1); contains InterPro domain Lipid-binding START; (InterPro:IPR002913)
At1g62180	APR2_APSR_ATAPR2_PRH__APR2 (5'ADENYLYLPHOSPHOSULFATE REDUCTASE 2)
At1g64780	ATAMT1;2__ATAMT1;2 (AMMONIUM TRANSPORTER 1;2); ammonium transporter
At1g73260	trypsin and protease inhibitor family protein / Kunitz family protein
At1g73325	trypsin and protease inhibitor family protein / Kunitz family protein
At1g74010	strictosidine synthase family protein
At1g74020	SS2__SS2 (STRICTOSIDINE SYNTHASE 2); strictosidine synthase
At1g74100	sulfotransferase family protein
At1g77760	NIA1_GNR1_NR1__NIA1 (NITRATE REDUCTASE 1)
At1g79520	cation efflux family protein
At1g79920	heat shock protein 70, putative / HSP70, putative
At2g16367	pseudo function Encodes a defensin-like (DEFL) family protein.
At2g16660	nodulin family protein
At2g22240	inositol-3-phosphate synthase isozyme 2 / myo-inositol-1-phosphate synthase 2 / MI-1-P synthase 2 / IPS 2
At2g26690	nitrate transporter (NTP2)
At2g27420	cysteine proteinase, putative
At2g29450	ATGSTU5_AT103-1A_ATGSTU1__ATGSTU5 (Arabidopsis thaliana Glutathione S-transferase (class tau) 5); glutathione transferase
At2g34930	disease resistance family protein
At2g36630	similar to unknown protein [Arabidopsis thaliana] (TAIR:AT2G25737.1); similar to Os03g0726500 [Oryza sativa (japonica cultivar-group)] (GB:NP_001051136.1); similar to membrane protein-like protein [Glycine max] (GB:ABC47859.1); contains InterPro domain Protein of unknown function DUF81; (InterPro:IPR002781)
At2g36800	DOGT1_UGT73C5__DOGT1 (DON-GLUCOSYLTRANSFERASE); UDP-glycosyltransferase/ transferase, transferring glycosyl groups
At2g36870	xyloglucan:xyloglucosyl transferase, putative / xyloglucan endotransglycosylase, putative / endo-xyloglucan transferase, putative
At2g36880	MAT3__MAT3 (METHIONINE ADENOSYLTRANSFERASE 3); methionine adenosyltransferase
At2g37040	PAL1__PAL1 (PHE AMMONIA LYASE 1); phenylalanine ammonia-lyase
At2g39675	gene TAS1C function Trans-acting siRNA1c primary transcript (TAS1c).
At2g43290	MSS3__MSS3 (MULTICOPY SUPPRESSORS OF SNF4 DEFICIENCY IN YEAST 3); calcium ion binding
At2g45570	CYP76C2__CYP76C2 (cytochrome P450, family 76, subfamily C, polypeptide 2); oxygen binding
At3g02380	COL2__COL2 (CONSTANS-LIKE 2); transcription factor/ zinc ion binding
At3g07090	similar to unknown protein [Arabidopsis thaliana] (TAIR:AT5G25170.1); similar to expressed protein [Oryza sativa (japonica cultivar-group)] (GB:ABB47783.1); similar to unknown protein [Oryza sativa] (GB:AAG16855.1); similar to Os02g0814000 [Oryza sativa (japonica cultivar-group)] (GB:NP_001048488.1); contains InterPro domain Protein of unknown function DUF862, eukaryotic; (InterPro:IPR008580)
At3g09440	heat shock cognate 70 kDa protein 3 (HSC70-3) (HSP70-3)
At3g12580	HSP70__HSP70 (heat shock protein 70); ATP binding
At3g17390	MTO3_MAT4_SAMS3__MTO3 (S-adenosylmethionine synthase 3); methionine adenosyltransferase
At3g18130	guanine nucleotide-binding family protein / activated protein kinase C receptor (RACK1)
At3g21670	product nitrate transporter (NTP3)
At3g22550	senescence-associated protein-related
At3g22840	ELIP1_ELIP__ELIP1 (EARLY LIGHT-INDUCABLE PROTEIN); chlorophyll binding
At3g23810	SAHH2__SAHH2 (S-ADENOSYL-L-HOMOCYSTEINE (SAH) HYDROLASE 2); adenosylhomocysteinase
At3g24170	ATGR1__ATGR1; glutathione-disulfide reductase
At3g43720	lipid binding
At3g44110	ATJ3_ATJ__ATJ3 (Arabidopsis thaliana DnaJ homologue 3)
At3g46670	UDP-glucoronosyl/UDP-glucosyl transferase family protein
At3g47960	proton-dependent oligopeptide transport (POT) family protein
At3g48100	ARR5_ATRR2_IBC6__ARR5 (ARABIDOPSIS RESPONSE REGULATOR 5); transcription regulator/ two-component response regulator
At3g53260	PAL2__PAL2 (phenylalanine ammonia-lyase 2); phenylalanine ammonia-lyase
At3g54400	aspartyl protease family protein
At3g55110	ABC transporter family protein
At3g56370	leucine-rich repeat transmembrane protein kinase, putative
At3g56400	WRKY70__WRKY70 (WRKY DNA-binding protein 70); transcription factor
At3g59140	ATMRP14__ATMRP14 (Arabidopsis thaliana multidrug resistance-associated protein 14)
At3g59930	Encodes a defensin-like (DEFL) family protein.
At4g01070	GT72B1__UDP-glucoronosyl/UDP-glucosyl transferase family protein
At4g01080	similar to unknown protein [Arabidopsis thaliana] (TAIR:AT1G01430.1); similar to unknown protein Cr17 [Brassica napus] (GB:AAX51387.1); contains InterPro domain Protein of unknown function DUF231, plant; (InterPro:IPR004253)
At4g01870	tolB protein-related
At4g01950	ATGPAT3_GPAT3__ATGPAT3/GPAT3 (GLYCEROL-3-PHOSPHATE ACYLTRANSFERASE 3); acyltransferase
At4g13930	SHM4__SHM4 (SERINE HYDROXYMETHYLTRANSFERASE 4); glycine hydroxymethyltransferase
At4g15210	BMY1_ATBETA-AMY_AT-BETA-AMY_RAM1__ATBETA-AMY (BETA-AMYLASE); beta-amylase
At4g15550	IAGLU__IAGLU (INDOLE-3-ACETATE BETA-D-GLUCOSYLTRANSFERASE); UDP-glycosyltransferase/ transferase, transferring glycosyl groups
At4g17090	BAM3_BMY8_CT-BMY_BMY8__CT-BMY (BETA-AMYLASE 8); beta-amylase
At4g17550	transporter-related
At4g21680	proton-dependent oligopeptide transport (POT) family protein
At4g21910	MATE efflux family protein
At4g22470	protease inhibitor/seed storage/lipid transfer protein (LTP) family protein
At4g26850	VTC2__VTC2 (VITAMIN C DEFECTIVE 2)
At4g27520	plastocyanin-like domain-containing protein
At4g30290	ATXTH19__ATXTH19 (XYLOGLUCAN ENDOTRANSGLUCOSYLASE/HYDROLASE 19); hydrolase, acting on glycosyl bonds
At4g30440	GAE1__GAE1 (UDP-D-GLUCURONATE 4-EPIMERASE 1); UDP-glucuronate 4-epimerase/ catalytic
At4g30450	glycine-rich protein
At4g33010	ATGLDP1__glycine dehydrogenase (decarboxylating), putative / glycine decarboxylase, putative / glycine cleavage system P-protein, putative
At4g34230	ATCAD5_CAD5_CAD-5__CAD5 (CINNAMYL ALCOHOL DEHYDROGENASE 5)
At4g34610	BLH6__BLH6 (BELL1-LIKE HOMEODOMAIN 5); DNA binding / transcription factor
At4g35090	CAT2__CAT2 (CATALASE 2); catalase
At4g36220	FAH1_CYP84A1__FAH1 (FERULATE-5-HYDROXYLASE 1); ferulate 5-hydroxylase
At4g37450	AGP18__AGP18 (Arabinogalactan protein 18)
At4g38400	ATEXLA2_ATEXPL2_ATHEXP BETA 2.2_EXPL2__ATEXLA2 (ARABIDOPSIS THALIANA EXPANSIN-LIKE A2)
At4g39510	CYP96A12__CYP96A12 (cytochrome P450, family 96, subfamily A, polypeptide 12); oxygen binding
At4g39800	MI-1-P SYNTHASE__MI-1-P SYNTHASE (Myo-inositol-1-phosphate synthase); inositol-3-phosphate synthase
At5g01410	ATPDX1.3_RSR4_PDX1__PDX1 (PYRIDOXINE BIOSYNTHESIS 1.3); protein heterodimerization/ protein homodimerization
At5g02490	heat shock cognate 70 kDa protein 2 (HSC70-2) (HSP70-2)
At5g13630	GUN5_CCH_CHLH__GUN5 (GENOMES UNCOUPLED 5)
At5g15350	plastocyanin-like domain-containing protein
At5g15500	ankyrin repeat family protein
At5g17380	pyruvate decarboxylase family protein
At5g24030	C4-dicarboxylate transporter/malic acid transport family protein
At5g24150	SQP1__SQP1 (Squalene monooxygenase 1)
At5g25190	ethylene-responsive element-binding protein, putative
At5g43580	serine-type endopeptidase inhibitor
At5g48180	kelch repeat-containing protein
At5g50915	basic helix-loop-helix (bHLH) family protein
At5g56000	heat shock protein 81-4 (HSP81-4)
At5g59310	LTP4__LTP4 (LIPID TRANSFER PROTEIN 4); lipid binding
At5g61820	similar to hypothetical protein [Trifolium pratense] (GB:BAE71234.1); contains InterPro domain Stress up-regulated Nod 19; (InterPro:IPR011692)
At5g62140	similar to Os02g0677600 [Oryza sativa (japonica cultivar-group)] (GB:NP_001047728.1); similar to hypothetical protein PMN2A_1395 [Prochlorococcus marinus str. NATL2A] (GB:YP_292586.1)
At5g62220	exostosin family protein
At5g62920	ARR6__ARR6 (RESPONSE REGULATOR 6); transcription regulator/ two-component response regulator
At5g67370	similar to unknown protein [Arabidopsis thaliana] (TAIR:AT5G11840.1); similar to Protein of unknown function DUF1230 [Medicago truncatula] (GB:ABE85761.1); contains InterPro domain Protein of unknown function DUF1230; (InterPro:IPR009631)
At1g09500	cinnamyl-alcohol dehydrogenase
At1g21910	AP2 domain-containing transcription factor family protein
At1g24851	similar to unknown protein [Arabidopsis thaliana] (TAIR:AT1G25112.1); similar to unknown protein [Arabidopsis thaliana] (TAIR:AT1G25025.1); similar to unknown protein [Arabidopsis thaliana] (TAIR:AT1G25180.1); similar to PREDICTED: hypothetical protein [Homo sapiens] (GB:XP_001133382.1)
At1g25025	similar to unknown protein [Arabidopsis thaliana] (TAIR:AT1G25112.1); similar to unknown protein [Arabidopsis thaliana] (TAIR:AT1G25180.1); similar to PREDICTED: hypothetical protein [Homo sapiens] (GB:XP_001129546.1)
At1g25112	similar to unknown protein [Arabidopsis thaliana] (TAIR:AT1G25025.1); similar to unknown protein [Arabidopsis thaliana] (TAIR:AT1G25180.1); similar to PREDICTED: hypothetical protein [Homo sapiens] (GB:XP_001129546.1)
At1g25180	similar to unknown protein [Arabidopsis thaliana] (TAIR:AT1G25112.1); similar to unknown protein [Arabidopsis thaliana] (TAIR:AT1G25025.1); similar to PREDICTED: hypothetical protein [Homo sapiens] (GB:XP_001129546.1)
At1g35140	PHI-1__PHI-1 (PHOSPHATE-INDUCED 1)
At1g37130	NIA2_B29_CHL3_NIA2-1_NR__NIA2 (NITRATE REDUCTASE 2)
At1g52690	late embryogenesis abundant protein, putative / LEA protein, putative
At1g68570	proton-dependent oligopeptide transport (POT) family protein
At2g29350	SAG13__SAG13 (Senescence-associated gene 13); oxidoreductase
At2g37770	oxidoreductase
At2g41260	M17__M17
At3g01345	unknown protein
At3g02480	ABA-responsive protein-related
At3g26570	PHT2;1_ORF02__PHT2;1 (phosphate transporter 2;1)
At3g28270	similar to AT14A [Arabidopsis thaliana] (TAIR:AT3G28290.1); similar to AT14A [Arabidopsis thaliana] (TAIR:AT3G28300.1); similar to Protein of unknown function DUF677 [Medicago truncatula] (GB:ABE78510.1); contains InterPro domain Protein of unknown function DUF677; (InterPro:IPR007749)
At3g44300	NIT2__NIT2 (NITRILASE 2)
At4g08950	phosphate-responsive protein, putative (EXO)
At4g11280	ACS6__ACS6 (1-AMINOCYCLOPROPANE-1-CARBOXYLIC ACID (ACC) SYNTHASE 6)
At4g37990	ELI3-2_ELI3__ELI3-2 (ELICITOR-ACTIVATED GENE 3)
At5g49480	ATCP1_ACP1__ATCP1 (CA2+-BINDING PROTEIN 1); calcium ion binding
At5g56010	HSP81-3__HSP81-3 (Heat shock protein 81-3); ATP binding
At2g15020	similar to unknown protein [Arabidopsis thaliana] (TAIR:AT5G64190.1); similar to hypothetical protein [Oryza sativa (japonica cultivar-group)] (GB:AAP46203.1)
At2g26080	ATGLDP2__glycine dehydrogenase (decarboxylating), putative / glycine decarboxylase, putative / glycine cleavage system P-protein, putative
At2g29440	ATGSTU6_GST24__ATGSTU6 (GLUTATHIONE S-TRANSFERASE 24); glutathione transferase
At2g42600	ATPPC2__ATPPC2 (PHOSPHOENOLPYRUVATE CARBOXYLASE 2); phosphoenolpyruvate carboxylase
At3g21250	ATMRP6__ATMRP6 (Arabidopsis thaliana multidrug resistance-associated protein 6)
At3g48520	CYP94B3__CYP94B3 (cytochrome P450, family 94, subfamily B, polypeptide 3); oxygen binding
At3g55970	oxidoreductase, 2OG-Fe(II) oxygenase family protein
At3g57150	NAP57_ATCBF5_ATNAP57_CBF5__NAP57 (ARABIDOPSIS THALIANA HOMOLOGUE OF NAP57)
At4g24830	arginosuccinate synthase family
At4g27280	calcium-binding EF hand family protein
At4g35060	heavy-metal-associated domain-containing protein / copper chaperone (CCH)-related
At4g35320	similar to unknown protein [Arabidopsis thaliana] (TAIR:AT2G17300.1); similar to Os02g0715300 [Oryza sativa (japonica cultivar-group)] (GB:NP_001047925.1); similar to Os08g0511400 [Oryza sativa (japonica cultivar-group)] (GB:NP_001062213.1); contains domain N-terminal domain of cbl (N-cbl) (SSF47668)
At5g01790	similar to unknown protein [Arabidopsis thaliana] (TAIR:AT2G40475.1); similar to hypothetical protein [Oryza sativa (japonica cultivar-group)] (GB:BAC20927.1); similar to Os01g0166500 [Oryza sativa (japonica cultivar-group)] (GB:NP_001042116.1); similar to Os05g0335500 [Oryza sativa (japonica cultivar-group)] (GB:NP_001055233.1)
At5g23920	similar to unknown protein [Arabidopsis thaliana] (TAIR:AT5G52420.1); similar to unknown [Xerophyta humilis] (GB:AAT45003.1)
At1g10960	ATFD1__ATFD1 (FERREDOXIN 1); electron carrier/ iron ion binding
At5g54160	ATOMT1_OMT1__ATOMT1 (O-METHYLTRANSFERASE 1)
At5g56030	HSP81-2_ERD8__HSP81-2 (EARLY-RESPONSIVE TO DEHYDRATION 8); ATP binding
At1g49780	U-box domain-containing protein
At4g37540	LBD39__LOB domain protein 39 / lateral organ boundaries domain protein 39 (LBD39)
At5g04950	nicotianamine synthase, putative
At5g12010	similar to unknown protein [Arabidopsis thaliana] (TAIR:AT4G29780.1); similar to Os01g0582600 [Oryza sativa (japonica cultivar-group)] (GB:NP_001043414.1); similar to Os05g0593000 [Oryza sativa (japonica cultivar-group)] (GB:NP_001056499.1); similar to unknown protein [Oryza sativa (japonica cultivar-group)] (GB:BAD72250.1)
At5g19850	hydrolase, alpha/beta fold family protein
At5g36160	aminotransferase-related
At4g00050	UNE10__UNE10 (unfertilized embryo sac 10); DNA binding / transcription factor
At1g19450	integral membrane protein, putative / sugar transporter family protein
At2g30490	ATC4H_C4H_CYP73A5__ATC4H (CINNAMATE-4-HYDROXYLASE)
At3g56290	similar to Os01g0823600 [Oryza sativa (japonica cultivar-group)] (GB:NP_001044661.1); similar to unnamed protein product [Ostreococcus tauri] (GB:CAL58546.1)
At4g28080	binding
At3g22930	calmodulin, putative
At5g10470	kinesin motor protein-related
At1g17420	LOX3__LOX3 (Lipoxygenase 3); iron ion binding / lipoxygenase
At1g72970	EDA17_HTH__HTH (HOTHEAD); aldehyde-lyase
At1g77640	AP2 domain-containing transcription factor, putative
At5g04530	beta-ketoacyl-CoA synthase family protein
At4g35630	PSAT__PSAT (phosphoserine aminotransferase); phosphoserine transaminase
At3g15354	gene SPA3 function Encodes a member of the SPA (suppressor of phyA-105) protein family (SPA1-SPA4). SPA proteins contain an N-terminal serine/threonine kinase-like motif followed by a coiled-coil structure and a C-terminal WD-repeat domain. SPA proteins function redundantly in suppressing photomorphogenesis in dark- and light-grown seedlings.
At4g25290	deoxyribodipyrimidine photolyase family protein / DNA photolyase family protein
At2g23130	AGP17__AGP17 (ARABINOGALACTAN PROTEIN 17)
At5g59630	pseudogene, glycine-rich protein
At5g24120	SIGE_SIG5__SIGE (RNA polymerase sigma subunit E); DNA binding / DNA-directed RNA polymerase/ sigma factor/ transcription factor
At1g60590	polygalacturonase, putative / pectinase, putative
At1g65890	acyl-activating enzyme 12 (AAE12)
At5g15450	APG6_CLPB3_CLPB-P__APG6/CLPB-P/CLPB3 (ALBINO AND PALE GREEN 6); ATP binding / ATPase
At2g27080	harpin-induced protein-related / HIN1-related / harpin-responsive protein-related
At4g14690	gene ELIP2 function Encodes an early light-induced protein.
At4g14090	UDP-glucoronosyl/UDP-glucosyl transferase family protein
At1g07720	beta-ketoacyl-CoA synthase family protein
At5g33355	Encodes a defensin-like (DEFL) family protein.
At5g64170	dentin sialophosphoprotein-related
At1g07600	MT1A_ATMT-2_ATMT-Q_LSR4_MT1_MT-Q__MT1A (METALLOTHIONEIN 1A)
At3g03480	CHAT__CHAT (ACETYL COA:(Z)-3-HEXEN-1-OL ACETYLTRANSFERASE); acetyl CoA:(Z)-3-hexen-1-ol acetyltransferase
At5g16360	NC domain-containing protein
At5g55570	unknown protein
At1g19050	ARR7__ARR7 (RESPONSE REGULATOR 7); transcription regulator/ two-component response regulator
At2g36590	ProT3_ATPROT3__ProT3 (PROLINE TRANSPORTER 3); amino acid permease
At5g52060	ATBAG1__ATBAG1 (ARABIDOPSIS THALIANA BCL-2-ASSOCIATED ATHANOGENE 1); protein binding
At1g06360	fatty acid desaturase family protein
At2g20830	folic acid binding / transferase
At2g21210	auxin-responsive protein, putative
At3g17800	mRNA level of the MEB5.2 gene (At3g17800) remains unchanged after cutting the inflorescence stem
At3g56150	EIF3C_ATTIF3C1_EIF3C-1_TIF3C1__EIF3C (EUKARYOTIC TRANSLATION INITIATION FACTOR 3)
At1g43160	RAP2.6__RAP2.6 (related to AP2 6); DNA binding / transcription factor
At1g01320	tetratricopeptide repeat (TPR)-containing protein
At1g17170	GST__ATGSTU24 (Arabidopsis thaliana Glutathione S-transferase (class tau) 24); glutathione transferase
At5g49910	cpHSC70-2_HSC70-7__cpHSC70-2 (HEAT SHOCK PROTEIN 70-7); ATP binding / unfolded protein binding
At4g34630	unknown protein
At5g37770	TCH2_CML24__TCH2 (TOUCH 2); calcium ion binding
At1g72930	TIR__TIR (TOLL/INTERLEUKIN-1 RECEPTOR-LIKE); transmembrane receptor
At2g38870	protease inhibitor, putative
At3g46660	UDP-glucoronosyl/UDP-glucosyl transferase family protein
At1g56110	NOP56__NOP56 (ARABIDOPSIS HOMOLOG OF NUCLEOLAR PROTEIN NOP56)
At2g42690	lipase, putative
At3g51895	SULTR3;1_AST12_ATST1__SULTR3;1 (SULFATE TRANSPORTER 1); sulfate transporter
At5g63450	CYP94B1__CYP94B1 (cytochrome P450, family 94, subfamily B, polypeptide 1); oxygen binding
At2g16500	ADC1_ARGDC_SPE1__ADC1 (ARGININE DECARBOXYLASE 1)
At3g04770	RPSAB__RPSAB (40S ribosomal protein SA B); structural constituent of ribosome
At1g73010	phosphoric monoester hydrolase
At3g54470	product uridine 5'-monophosphate synthase / UMP synthase (PYRE-F) (UMPS)
At5g58870	FTSH9__FTSH9 (FtsH protease 9); ATP-dependent peptidase/ ATPase/ metallopeptidase
At5g09590	mtHSC70-2_HSC70-5__mtHSC70-2 (HEAT SHOCK PROTEIN 70); ATP binding / unfolded protein binding
At3g44735	ATPSK3_PSK1__PSK1 (PHYTOSULFOKINE 3 PRECURSOR); growth factor
At5g20270	HHP1__HHP1 (HEPTAHELICAL TRANSMEMBRANE PROTEIN1)
At1g48630	guanine nucleotide-binding family protein / activated protein kinase C receptor, putative / RACK, putative
At3g13110	AtSerat2;2_SAT-1_SAT3_SAT-A__AtSerat2;2 (SERINE ACETYLTRANSFERASE 1); serine O-acetyltransferase
At1g41830	SKS6__SKS6 (SKU5 Similar 6); pectinesterase
At5g55920	nucleolar protein, putative
At3g57020	strictosidine synthase
At5g17000	NADP-dependent oxidoreductase, putative
At2g19780	leucine-rich repeat family protein / extensin family protein
At3g06145	product unknown protein
At3g13080	ATMRP3_EST2_MRP3__ATMRP3 (Arabidopsis thaliana multidrug resistance-associated protein 3)
At3g06880	transducin family protein / WD-40 repeat family protein
At5g06530	ABC transporter family protein
At4g15200	formin homology 2 domain-containing protein / FH2 domain-containing protein
At5g02830	pentatricopeptide (PPR) repeat-containing protein
At5g52640	ATHSP90.1_HSP81-1_ATHS83_HSP81.1_HSP83__HSP81-1 (HEAT SHOCK PROTEIN 81-1); ATP binding / unfolded protein binding
At4g11650	ATOSM34__ATOSM34 (OSMOTIN 34)
At2g20750	ATEXPB1_ATHEXP BETA 1.5_EXPB1__ATEXPB1 (ARABIDOPSIS THALIANA EXPANSIN B1)
At5g44390	FAD-binding domain-containing protein
At5g20830	SUS1__SUS1 (SUCROSE SYNTHASE 1); UDP-glycosyltransferase/ sucrose synthase
At3g26960	similar to unknown protein [Arabidopsis thaliana] (TAIR:AT5G41050.1); similar to Os09g0508200 [Oryza sativa (japonica cultivar-group)] (GB:NP_001063620.1); similar to Os12g0472800 [Oryza sativa (japonica cultivar-group)] (GB:NP_001066754.1)
At5g57560	TCH4_XTH22__TCH4 (TOUCH 4); hydrolase, acting on glycosyl bonds
At1g23110	unknown protein
At2g34070	similar to unknown protein [Arabidopsis thaliana] (TAIR:AT1G29050.1); similar to unknown [Pisum sativum] (GB:ABA29157.1); contains InterPro domain Protein of unknown function DUF231, plant; (InterPro:IPR004253)
At1g17100	SOUL heme-binding family protein
At3g14060	similar to unknown protein [Arabidopsis thaliana] (TAIR:AT1G54120.1)
At3g62700	ATMRP10__ATMRP10 (Arabidopsis thaliana multidrug resistance-associated protein 10)
At1g04120	ATMRP5_MRP5__ATMRP5 (Arabidopsis thaliana multidrug resistance-associated protein 5)
At5g56980	similar to unknown protein [Arabidopsis thaliana] (TAIR:AT4G26130.1); similar to cDNA-5-encoded protein (GB:AAA50235.1)
At1g58520	gene RXW8 function No information available for this gene.
At4g16980	arabinogalactan-protein family
At4g38710	glycine-rich protein
At4g00430	PIP1;4_PIP1E_TMP-C_PIP1;4_PIP1E__TMP-C (plasma membrane intrinsic protein 1;4); water channel
At1g26770	ATEXPA10_ATEXP10_AT-EXP10_ATHEXP ALPHA 1.1_EXP10__ATEXPA10 (ARABIDOPSIS THALIANA EXPANSIN A10)
At1g56650	ATMYB75_PAP1_MYB75_SIAA1__PAP1 (PRODUCTION OF ANTHOCYANIN PIGMENT 1); DNA binding / transcription factor
At5g02500	HSC70-1_HSC70_HSP70-1__HSC70-1 (heat shock cognate 70 kDa protein 1); ATP binding
At3g05060	SAR DNA-binding protein, putative
At1g04220	beta-ketoacyl-CoA synthase, putative
At4g12320	CYP706A6__CYP706A6 (cytochrome P450, family 706, subfamily A, polypeptide 6); oxygen binding
At5g59480	haloacid dehalogenase-like hydrolase family protein
At2g13580	pseudogene, similar to OSJNBa0072K14.8,
At3g48200	similar to Os05g0594500 [Oryza sativa (japonica cultivar-group)] (GB:NP_001056507.1); similar to IMP dehydrogenase/GMP reductase [Medicago truncatula] (GB:ABE93579.1); contains domain gb def: Hypothetical protein At3g48200 (PTHR12326:SF1); contains domain UNCHARACTERIZED (PTHR12326)
At4g36020	CSDP1__CSDP1 (COLD SHOCK DOMAIN PROTEIN 1); nucleic acid binding
At5g13220	JAS1_JAZ10_TIFY9__similar to unknown protein [Arabidopsis thaliana] (TAIR:AT1G19180.1); similar to P0482D04.10 [Oryza sativa (japonica cultivar-group)] (GB:BAB89663.1); similar to Os04g0395800 [Oryza sativa (japonica cultivar-group)] (GB:NP_001052661.1); contains InterPro domain ZIM; (InterPro:IPR010399)
At2g33380	RD20__RD20 (RESPONSIVE TO DESSICATION 20); calcium ion binding
At1g57590	carboxylic ester hydrolase
At2g37240	Identical to UPF0308 protein At2g37240, chloroplast precursor [Arabidopsis Thaliana] (GB:Q9ZUU2;GB:Q94A62); similar to unknown protein [Arabidopsis thaliana] (TAIR:AT5G65840.1); similar to Os03g0284600 [Oryza sativa (japonica cultivar-group)] (GB:NP_001049763.1); similar to PREDICTED: similar to TPA_exp: C9ORF21 isoform 2 [Pan troglodytes] (GB:XP_520707.2); similar to Os03g0729200 [Oryza sativa (…
At3g09940	ATMDAR3_MDHAR__MDHAR (MONODEHYDROASCORBATE REDUCTASE); monodehydroascorbate reductase (NADH)
At4g29720	ATPAO5__ATPAO5 (POLYAMINE OXIDASE 5); amine oxidase
At1g10640	polygalacturonase, putative / pectinase, putative
At3g48610	phosphoesterase family protein
At5g57800	CER3_FLP1_WAX2_YRE__WAX2; catalytic
At3g29590	AT5MAT__AT5MAT; O-malonyltransferase/ transferase
